# Supplementary material for: A Novel Class of HIV-1 Inhibitors Targeting the Vpr-Induced G2-Arrest in Macrophages by New Yeast- and Cell-Based High-Throughput Screening
Source: Viruses. 2022 Jun 16;14(6):1321. doi: 10.3390/v14061321 (PMC9227106; doi:10.3390/v14061321)
Supplement: Supplementary file 1 [file viruses-14-01321-s001.zip]

Archive with 4 entries (4 files):
- Figures S1-S4.pdf
- Table S1 Result of 1st screening.xlsx
- Table S2 Result of 2nd screening.xlsx
- Table S3 Result of 3rd screening.xlsx
