# Supplementary material for: A Novel Class of HIV-1 Inhibitors Targeting the Vpr-Induced G2-Arrest in Macrophages by New Yeast- and Cell-Based High-Throughput Screening
Source: Viruses. 2022 Jun 16;14(6):1321. doi: 10.3390/v14061321 (PMC9227106; doi:10.3390/v14061321)
Supplement: Supplementary file 1 [file viruses-14-01321-s001.zip › Table S1 Result of 1st screening.xlsx]

## Sheet: 1st screening
	recover rate Vpr+ (%)							recover rate Keap1+ (%)
	screening	dose response (n = 1)			dose response (n = 2)			counter assay (n = 1)			counter assay (n = 2)
#	20 uM	20 uM	2 uM	0.2 uM	20 uM	2 uM	0.2 uM	20 uM	2 uM	0.2 uM	20 uM	2 uM	0.2 uM
1	18.7953	2.76884	23.763	7.68238	-14.2186	23.9024	5.36829	3.32278	3.6	12.2779	4.65503	4.86169	13.5537
2	16.4441	19.5106	6.70573	0.710137	18.9189	8.41464	3.74532	4.43038	-0.240001	0.646204	5.81879	1.00587	-1.32231
3	16.2667	18.8667	28.3203	15.5584	29.4947	27.9268	14.1074	17.4051	8.24	10.6624	10.4738	11.7351	12.0661
4	100.478	101.674	100.716	105.81	98.5899	103.903	102.747	110.127	109.84	98.7076	107.897	109.137	101.818
5	45.1877	79.3947	18.6849	0.839253	81.3161	17.3171	2.24719	75.1582	1.52	0.969305	70.6567	1.34116	0.330579
6	27.4403	44.7521	36.5234	0.0645578	41.2456	37.0732	-0.374533	123.418	4.72	0.646204	134.331	8.38223	0
7	100.689	93.9472	90.8203	82.6985	94.4771	94.7561	92.2597	105.063	95.92	42.0032	99.7506	102.431	38.1818
8	20.4724	2.2537	16.4714	0.710137	3.29025	16.9512	-2.24719	13.924	-1.2	-0.807755	18.4539	-1.17351	-2.64463
9	18.6352	15.9047	17.3828	-0.193671	16.2162	15.4878	0	37.1835	9.52	-0.161551	45.054	12.4057	-0.495869
10	15.7929	16.4198	8.39844	1.61394	7.75558	8.41464	2.87141	10.2848	3.44	0.646204	17.9551	3.52054	0.661158
11	16.1452	13.8442	11.263	6.90768	15.6287	12.9268	5.61798	4.43038	1.36	0.969305	4.15627	1.67644	0.826446
12	17.8974	5.3445	9.17969	2.9051	14.4536	7.80488	3.74532	4.11392	-1.2	0.646204	-2.32752	-0.502934	0.165289
13	17.1464	34.0631	11.3932	2.00129	42.3032	11.0976	1.24844	0.158227	-0.0799999	0.16155	1.66251	2.01173	0.991735
14	34.4633	6.63233	18.1641	1.2266	8.81316	17.439	0.374531	10.7595	0.56	0.323101	11.8038	1.84409	0.826446
15	20.443	-5.98841	15.1693	8.19884	-5.2879	15.3659	7.74032	13.7658	5.04	2.26171	19.9501	5.36463	2.14876
16	110.472	103.348	102.018	101.033	98.5899	96.4634	105.618	112.025	116.56	120.355	115.378	111.316	125.62
17	16.0441	9.8519	7.09635	2.13041	5.87544	4.02439	-0.624221	0.949366	0.399999	-0.323102	2.49376	0.502932	-0.495869
18	36.0786	30.0708	12.8255	3.55068	28.6721	11.7073	-1.9975	1.89873	1.2	0.646204	2.66002	3.0176	-1.98347
19	15.0276	9.20799	8.91927	2.64687	8.22562	8.04878	2.24719	2.37342	2.96	0.969305	5.65254	3.85582	0
20	21.5445	26.98	2.92969	0.0645578	23.9718	4.7561	-12.6092	1.26582	-1.68	0.646204	-1.16376	-1.5088	-2.14876
21	17.9602	15.7759	2.27865	1.2266	11.3984	2.80488	1.87266	-2.53165	-0.72	0.646204	-1.49626	-0.335289	0
22	16.5021	20.6697	2.27865	2.77598	23.5018	3.41463	0.749063	3.9557	-0.72	-0.646204	2.99252	0.33529	-1.4876
23	15.1558	16.5486	1.88802	0.0645578	23.5018	1.95122	1.24844	3.63924	0.0799999	-0.484654	6.48379	-0.335289	-0.826446
24	23.3711	30.3284	2.66927	0.968367	26.2045	3.29268	1.62297	8.38608	-0.880001	-1.29241	14.2976	-1.00587	-1.15702
25	19.8418	26.3361	14.2578	0.581021	20.329	14.878	-0.624221	48.5759	-0.56	0.323101	51.7041	0.33529	0.330579
26	23.1087	20.1545	9.17969	1.48483	17.3913	9.26829	-2.37204	7.27848	-1.04	-0.646204	12.1363	0.33529	-0.165289
27	25.8597	26.2073	0.846354	2.13041	32.6675	1.09756	2.99625	0.474683	-0.240001	-0.323102	2.16126	1.34116	0
28	18.4626	22.6014	13.8672	2.77598	17.8613	15.122	4.11985	-0.791141	-0.72	0.969305	-0.166252	-0.838222	0.330579
29	20.616	8.04894	1.36719	1.48483	10.9283	1.70732	0.124842	1.89873	1.2	0.323101	2.32751	1.67644	1.4876
30	15.982	17.1925	13.9974	3.03422	13.7485	13.4146	-0.624221	6.01266	-1.2	0.646204	8.1463	-1.34116	0.826446
31	22.2721	28.1391	16.862	3.42156	21.6216	16.2195	4.74407	20.8861	-0.56	0	32.7515	-0.335289	0.661158
32	16.7522	12.6851	5.27344	2.13041	11.9859	6.34146	0.249686	26.5823	2.96	1.45396	32.0864	4.5264	0.991735
33	23.5184	12.9427	2.14844	0.581021	15.6287	0.731706	0.124842	-0.316455	-0.0799999	-0.646204	2.99252	-0.167646	0.165289
34	22.5203	21.4424	1.4974	1.09748	20.2115	-0.731707	-0.624221	12.3418	1.84	2.26171	15.7939	-0.167646	-0.165289
35	18.9021	24.9195	3.45052	2.00129	27.1445	1.21951	-0.374533	1.42405	0.72	0.16155	2.49376	-0.502934	0
36	17.5062	18.7379	8.65886	0.710137	22.2092	2.68293	0.124842	2.68987	0.24	0.646204	2.66002	-0.670578	-0.165289
37	15.9119	17.5789	2.01823	2.00129	17.0388	2.56098	0.374531	3.16456	0.0799999	-0.484654	2.32751	1.67644	0.991735
38	15.625	10.4958	6.1849	3.93802	10.8108	6.58537	-0.374533	11.2342	0.0799999	-1.45396	17.2901	-0.670578	-1.4876
39	16.6259	-3.7991	-1.10677	1.48483	-6.93302	-0.487804	0.249686	3.48101	-0.240001	0.807753	19.1189	0.670577	0.165289
40	16.0147	15.132	0.195311	3.03422	15.0411	2.19512	1.87266	3.00633	0.24	-1.77706	2.82627	-1.67644	-0.826446
41	19.2118	15.0032	2.27865	2.38864	8.93067	1.09756	0.749063	2.68987	0.24	-0.484654	4.15627	0.670577	0.991735
42	16.4751	15.9047	7.35677	0.839253	17.6263	7.56098	1.62297	1.89873	0.88	1.13086	0.166251	1.5088	1.4876
43	24.1379	-11.5261	6.05469	1.87217	-13.9835	5.2439	2.49688	57.7532	-1.36	-0.323102	55.6941	-0.838222	0.495868
44	17.2414	16.5486	5.40365	2.13041	19.1539	4.02439	2.37203	6.64557	0.72	1.45396	6.48379	3.0176	0.661158
45	15.229	19.897	6.70573	3.16333	21.2691	8.29268	3.1211	8.38608	4.72	2.42326	5.65254	2.68231	0.991735
46	25.1609	26.7225	1.10677	2.64687	22.7967	2.31707	0.124842	0.158227	0.0799999	0.807753	-0.831255	0.838223	1.15702
47	17.846	15.5183	4.49219	2.38864	15.1586	5.12195	3.995	4.74683	2.16	1.29241	3.65752	2.17938	1.15702
48	22.9448	16.1623	5.53385	5.74564	11.2808	5.73171	2.99625	1.89873	1.68	0.807753	3.82377	1.84409	0.661158
49	15.9961	8.04894	1.6276	1.74306	9.87074	0.731706	0.124842	2.8481	0.0799999	-0.161551	2.49376	-0.502934	-0.826446
50	38.3933	50.0322	11.5234	2.25952	47.0035	8.41464	0.249686	137.658	3.28	1.13086	143.973	5.36463	0.165289
51	17.2871	11.2685	3.1901	2.51776	7.40306	1.95122	0.624219	3.00633	1.2	0.16155	2.49376	0.33529	0.330579
52	19.2249	15.5183	3.45052	1.48483	15.5112	0.609757	0.624219	2.05696	0.0799999	0.646204	0.332502	1.17351	-0.991735
53	21.1627	13.973	6.05469	0.581021	14.8061	7.31707	0.374531	1.26582	0.72	0.646204	0.665004	-0.670578	0.661158
54	17.3891	8.82164	7.22656	6.90768	8.22562	9.39025	7.1161	2.37342	2.48	1.13086	-0.166252	0.502932	-0.495869
55	15.9757	11.0109	5.40365	-3.29244	15.6287	6.09756	2.62172	0.632911	-0.880001	1.77706	-0.166252	1.67644	0.330579
56	16.1765	11.9124	5.14323	0.451905	14.6886	1.46341	1.74781	1.7405	-0.0799999	-0.969306	1.16376	0.167645	-0.826446
57	20.7404	7.27624	0.455728	0.0645578	12.3384	0.121951	2.24719	1.7405	1.84	0.484652	2.66002	1.00587	-0.495869
58	15.1623	7.01867	0.976563	0.710137	4.11281	1.82927	1.12359	1.1076	0.72	-0.161551	2.66002	0.33529	-0.661157
59	17.9006	7.66259	3.97135	4.45449	9.2832	4.14634	3.1211	1.26582	0.399999	0.323101	0.498752	0.167645	0.495868
60	18.5556	14.4881	10.4818	3.93802	15.9812	9.87805	6.49188	33.0696	6.8	1.13086	37.5727	6.0352	-0.165289
61	24.9868	28.2679	0.195311	1.61394	22.3267	1.34146	1.9975	2.68987	-0.0799999	0.484652	4.82128	0.33529	0.330579
62	16.8687	11.1397	2.01823	1.74306	11.6334	3.53659	0.499375	3.63924	1.04	0.323101	3.82377	1.00587	0.495868
63	17.0157	5.85963	10.0912	2.25952	16.2162	9.39025	3.49563	0.949366	2.16	0.807753	3.15877	2.34702	1.32231
64	17.4346	20.6697	3.58073	2.51776	18.8014	4.39024	3.24594	1.1076	0.24	0.807753	1.33001	1.5088	0.826446
65	25.1833	10.6246	4.88281	0.839253	6.81551	2.80488	1.24844	2.05696	-0.4	-0.323102	0.997506	0.502932	0.165289
66	17.1204	19.6394	4.7526	3.93802	14.2186	4.39024	-2.24719	1.89873	0.0799999	1.45396	0.166251	0.167645	-1.4876
67	19.5211	7.79137	2.92969	3.80891	8.93067	0.609757	-0.499377	1.26582	-0.72	0.807753	2.16126	0.838223	1.32231
68	15.5648	11.2685	9.3099	3.29245	5.64042	2.56098	1.12359	5.06329	0.24	0.969305	5.81879	-1.00587	-1.32231
69	26.0802	5.85963	1.4974	1.48483	12.4559	2.07317	-0.374533	0.632911	1.04	0.969305	1.49626	0.167645	-0.165289
70	16.0854	8.56407	2.53906	3.16333	10.5758	1.58537	1.9975	0.474683	-1.04	-0.646204	1.33001	-0.335289	-1.98347
71	20.2868	7.01867	3.71094	2.64687	9.63572	13.6585	-0.124844	1.89873	2.48	0.807753	1.99501	0	4.6281
72	17.2066	11.2685	2.40885	0.710137	10.1058	3.41463	1.24844	1.26582	-0.240001	-0.646204	-0.665005	0.33529	-1.81818
73	15.5072	4.31423	10.7422	20.8522	-2.82021	2.43902	-9.48814	1.42405	1.04	1.45396	3.99003	2.17938	-0.165289
74	16.5693	2.2537	0.195311	0.968367	0.822562	0.121951	-1.49813	3.48101	1.04	0	2.49376	1.17351	0.165289
75	21.9436	7.14746	9.83073	2.51776	11.7509	4.5122	3.62047	7.43671	-0.0799999	1.45396	4.48878	-1.67644	-1.81818
76	24.4514	12.9427	9.96094	7.16591	11.8684	6.46342	7.24095	5.6962	2.16	1.45396	5.32003	4.19111	0.495868
77	16.4054	8.56407	8.52865	9.10265	11.1633	9.7561	0.99875	2.21519	0.24	0.646204	2.66002	0.838223	1.15702
78	17.4035	7.53381	1.23698	1.61394	9.87074	4.26829	0	0.632911	0.0799999	-0.161551	1.99501	0.167645	-0.330579
79	26.8047	7.01867	4.23177	0.839253	15.1586	5.2439	1.87266	3.32278	1.36	0.969305	3.15877	1.17351	0.826446
80	18.4108	3.15518	9.44011	3.93802	5.75793	8.04878	3.87016	3.00633	2.32	1.77706	3.32502	0.167645	0.330579
81	15.0532	4.95815	0.846354	1.35571	3.87779	-0.243901	0.749063	-0.316455	-0.72	0.646204	-1.16376	-0.167646	-0.826446
82	26.2451	10.6246	3.45052	1.61394	8.93067	0.609757	1.62297	2.8481	-1.2	1.61551	2.16126	-1.67644	-1.65289
83	15.9485	4.18545	5.40365	3.67979	4.34783	3.90244	1.49813	0.949366	-0.240001	0.646204	1.49626	0.502932	2.14876
84	27.9239	13.8442	3.97135	0.451905	10.6933	4.87805	1.24844	0.949366	-0.56	-0.161551	-0.332502	-1.34116	-2.97521
85	17.2451	7.14746	0.846354	-0.710135	8.57814	1.21951	0.749063	0.316454	-0.4	-0.646204	1.49626	-0.670578	-0.495869
86	27.115	11.3973	3.45052	6.39122	10.8108	2.43902	-0.499377	3.00633	-1.2	-0.969306	2.16126	-2.01173	-2.14876
87	20.0651	5.73085	3.0599	2.77598	6.58049	6.70732	5.36829	2.53165	-1.84	0.323101	2.99252	0.167645	0.495868
88	24.0104	14.6169	3.84115	3.29245	16.6863	6.09756	5.61798	5.53797	-0.72	-1.45396	3.32502	1.17351	-1.4876
89	17.4479	4.44301	4.49219	35.3131	7.9906	0.97561	-8.86392	2.53165	-1.2	1.13086	2.16126	3.18525	0.165289
90	20.2604	8.82164	2.27865	3.93802	13.2785	3.90244	2.12235	4.43038	2.16	0.646204	4.65503	1.34116	0.826446
91	21.1979	14.1017	4.88281	4.45449	12.926	5	3.1211	2.53165	-0.72	0.969305	2.16126	4.19111	-0.495869
92	16.6402	13.0715	5.40365	2.64687	9.04818	5.73171	4.74407	3.79747	0.24	1.13086	2.66002	2.34702	1.32231
93	15.5803	5.3445	5.53385	2.25952	7.40306	3.90244	3.49563	1.58228	0.88	0.646204	4.98753	1.67644	1.15702
94	21.0917	11.0109	9.70052	7.16591	12.4559	6.95122	6.11735	0.949366	0.72	-0.161551	-0.332502	0.838223	1.32231
95	16.8522	5.85963	8.13802	10.7812	8.69565	8.29268	3.1211	2.21519	2.48	1.61551	1.49626	3.0176	1.15702
96	15.2623	6.24598	8.26823	3.55068	4.58284	5.4878	3.1211	0.791139	1.68	1.45396	2.49376	1.17351	2.47934
97	15.6863	6.24598	3.97135	2.9051	3.87779	1.70732	1.62297	2.37342	-0.240001	0	1.49626	-0.670578	-0.330579
98	19.5019	10.367	9.04948	2.51776	6.11046	3.78049	5.1186	8.22785	2.32	1.93861	7.14879	1.00587	-1.15702
99	18.9719	-3.15518	6.83594	5.74564	6.46298	1.09756	0	13.924	1.36	0.969305	21.1139	1.84409	0.826446
100	18.018	15.132	6.3151	3.55068	12.691	4.14634	-0.124844	4.43038	0.399999	0.323101	0.997506	0	-0.826446
101	20.7625	6.37476	2.66927	0.451905	8.69565	1.82927	0.624219	1.1076	1.2	0.484652	1.49626	0.670577	0.330579
102	16.847	11.3973	2.79948	2.38864	10.4583	4.02439	1.37328	2.05696	-1.84	0	0	-1.84409	-0.991735
103	20.0816	16.4198	0.976563	3.42156	15.9812	12.1951	12.1099	6.01266	-2.96	0.646204	3.15877	-1.17351	0.495868
104	16.7176	10.2383	11.0026	5.48741	8.57814	2.92683	1.24844	2.8481	-0.4	1.29241	1.33001	-0.670578	-2.14876
105	17.3292	10.2383	5.27344	-0.451904	-10.8108	0.97561	0.374531	-18.8291	1.84	-4.68498	9.97506	8.88516	1.4876
106	28.9348	6.88989	2.40885	2.38864	8.69565	0.365854	0.99875	1.26582	2.32	1.29241	1.33001	1.67644	1.4876
107	20.3498	4.05666	24.9349	4.19626	8.22562	4.7561	5.1186	2.21519	7.28	4.36187	4.48878	10.8969	-20.4959
108	21.7276	11.3973	4.7526	5.10006	12.3384	5.85366	3.49563	5.85443	1.36	1.29241	2.16126	3.35289	0.661158
109	20.5617	2.89762	4.23177	7.16591	8.10811	11.2195	3.24594	0.316454	-0.4	1.13086	4.32253	1.00587	2.14876
110	15.5803	13.2003	5.14323	3.67979	11.6334	7.56098	2.12235	5.85443	1.68	-0.323102	5.15378	2.17938	0.826446
111	15.0503	4.95815	3.71094	4.06714	9.04818	5.4878	3.74532	5.06329	0.72	0.969305	2.32751	1.5088	0.661158
112	18.8659	13.329	5.01302	4.71272	13.631	4.02439	5.1186	6.48734	2	0.16155	8.81131	2.84996	1.32231
113	15.2623	4.82936	2.01823	3.67979	3.52527	1.09756	2.37203	5.53797	0.56	0.807753	1.66251	0.33529	0.826446
114	25.3454	12.17	4.49219	3.80891	9.40071	2.68293	0.124842	11.076	0.399999	0.969305	9.47631	0.502932	-0.495869
115	21.2008	1.73857	5.92448	3.93802	1.2926	2.43902	0.624219	16.1392	0.399999	0.16155	18.9526	1.34116	0.165289
116	21.7322	13.5866	5.66406	2.51776	5.52291	1.58537	-0.374533	1.89873	-0.72	0.969305	0.665004	-0.502934	-1.32231
117	19.3943	9.20799	4.88281	2.77598	10.1058	2.80488	0.873907	3.9557	0.399999	0.646204	1.33001	0.33529	-1.4876
118	15.5685	12.2988	5.01302	1.2266	9.75323	4.63415	-0.249688	6.17089	0.56	-0.161551	1.33001	-0.670578	-1.32231
119	18.3316	7.53381	5.01302	3.29245	10.4583	-3.17073	-4.61923	2.21519	1.68	-0.484654	2.49376	1.34116	1.32231
120	20.2444	14.6169	4.36198	3.42156	18.3314	3.65854	0.99875	5.22152	0.72	0.484652	2.82627	0.33529	-0.165289
121	23.1137	1.60979	1.75781	8.19884	-8.34313	0.243902	0.499375	5.6962	13.36	0.16155	1.66251	23.8055	0.495868
122	32.7843	10.367	6.44531	3.42156	18.6839	2.07317	2.12235	4.74683	1.2	0	5.81879	1.17351	0.330579
123	31.084	10.7534	10.0912	4.06714	-3.64277	6.09756	4.11985	2.68987	2.32	5.49273	1.82876	13.9145	0.330579
124	15.8262	14.1017	5.92448	5.22918	10.8108	6.34146	4.11985	6.17089	2.48	1.45396	1.33001	3.18525	-0.330579
125	18.4013	6.37476	13.6068	-1.09748	9.51821	7.56098	-5.99251	0.316454	-4.08	1.29241	3.32502	1.17351	1.4876
126	20.3326	11.9124	2.66927	4.71272	11.2808	5.97561	3.62047	3.79747	-0.4	0.484652	5.15378	3.18525	0.826446
127	16.8991	9.33677	4.6224	3.67979	9.51821	5.4878	4.61923	5.37975	0.88	0.484652	2.49376	0.838223	0.330579
128	25.5901	19.897	6.44531	4.71272	15.3937	6.34146	4.61923	5.22152	0.399999	0.969305	3.49127	1.17351	-0.661157
129	15.0029	5.98841	4.49219	2.38864	5.87544	1.34146	0.499375	5.85443	2.64	3.87722	7.8138	1.17351	0.826446
130	23.2173	14.8744	8.00781	2.64687	13.866	3.65854	2.49688	0.474683	0.56	1.29241	-0.665005	0.167645	-2.14876
131	25.271	6.50354	4.49219	3.42156	8.93067	3.04878	3.74532	1.42405	0.88	0.323101	2.16126	0.167645	-1.32231
132	17.1706	17.4501	5.79427	4.06714	12.926	4.14634	1.74781	3.00633	-0.880001	0.323101	3.49127	0.167645	-1.81818
133	15.3451	7.01867	4.36198	2.77598	9.40071	3.90244	3.1211	5.37975	0.56	-1.77706	7.98005	-0.335289	-0.661157
134	15.4592	12.6851	3.97135	4.32537	13.2785	3.41463	3.995	-1.1076	-1.2	0	-0.831255	-1.17351	-1.15702
135	26.7541	4.82936	2.40885	4.32537	6.81551	5.73171	8.2397	2.53165	0.399999	1.77706	-5.32003	0.838223	0
136	17.9692	7.53381	4.6224	3.55068	9.2832	2.92683	7.61548	2.37342	0.399999	-0.484654	-0.166252	-0.670578	-1.4876
137	15.0029	4.5718	1.88802	3.29245	19.859	-2.19512	-9.3633	1.26582	-8.88	-12.2779	-2.32752	-0.335289	5.12397
138	23.1032	8.04894	1.75781	1.87217	5.99295	0.853658	1.12359	3.63924	0.72	-0.646204	3.49127	1.84409	0.661158
139	21.6201	11.3973	14.1276	3.42156	10.3408	7.07317	3.74532	1.42405	2.8	0.484652	1.99501	-4.02347	-6.61157
140	16.1922	23.8893	6.70573	4.45449	21.8566	6.82927	3.995	14.8734	3.28	1.13086	16.1263	1.84409	0.826446
141	15.3483	4.44301	8.00781	1.09748	8.46063	8.65854	3.995	12.5	8.08	3.87722	5.32003	2.68231	3.1405
142	26.6234	41.1462	4.6224	4.32537	40.423	5.60976	2.62172	2.8481	0.399999	1.45396	1.99501	0.502932	1.4876
143	31.8573	33.6768	6.96615	3.80891	34.3126	5.60976	3.995	40.981	4.56	1.61551	44.389	5.02934	0.991735
144	15.0646	21.056	17.9036	3.67979	18.6839	15.2439	3.62047	8.70253	4.08	1.77706	12.6351	6.70578	1.4876
145	15.6503	2.76884	19.4661	3.80891	-1.17509	16.4634	4.36954	3.48101	-3.76	-1.77706	2.82627	-2.01173	-0.826446
146	17.5931	20.1545	6.3151	3.29245	14.3361	4.26829	0	7.43671	-0.880001	0.323101	8.97756	-0.502934	-0.165289
147	15.1106	18.094	8.00781	3.80891	12.3384	6.95122	0.99875	1.42405	-0.240001	0.323101	5.32003	0	0.165289
148	15.7582	15.5183	21.4193	0.193673	11.8684	23.5366	-0.749065	4.11392	0.24	0.807753	3.65752	2.17938	-1.81818
149	15.6503	17.5789	12.3047	7.29503	12.691	10	3.995	-0.316455	-0.0799999	0.807753	-0.498753	0	1.15702
150	16.19	15.132	6.05469	4.19626	10.6933	6.46342	2.49688	1.26582	-1.84	-0.323102	-1.33001	-2.01173	-1.15702
151	17.6028	21.5711	11.263	17.8825	21.2691	11.4634	6.36704	11.3924	1.2	2.90792	17.7889	1.67644	1.65289
152	15.9815	19.6394	5.79427	1.87217	15.0411	1.95122	3.24594	36.2342	1.2	-0.161551	34.9127	0.838223	0.826446
153	15.6359	17.9652	5.27344	1.48483	13.161	6.46342	0.124842	24.6835	3.76	-3.06947	30.5902	0.167645	-0.330579
154	15.1692	13.0715	6.70573	1.2266	9.40071	3.78049	3.62047	124.525	0.24	0.16155	143.973	-0.502934	0.165289
155	16.308	18.4804	11.9141	3.16333	12.3384	13.4146	4.86891	3.48101	0.72	1.61551	1.33001	2.51467	-0.165289
156	18.5608	16.4198	20.5078	4.32537	15.7462	18.6585	5.74282	72.4684	-0.0799999	1.29241	83.2918	-0.670578	1.15702
157	15.6128	17.1925	-7.7474	6.90768	13.9835	7.07317	7.99001	4.11392	4.08	0.484652	3.99003	1.00587	0.495868
158	29.7003	25.0483	3.71094	4.45449	21.8566	4.26829	3.37079	52.057	4.72	1.13086	55.6941	6.37049	0.826446
159	15.3368	22.9878	7.48698	4.06714	18.4489	6.34146	3.87016	54.7468	-0.4	0.484652	56.8579	0.167645	1.32231
160	59.6349	67.8042	34.3099	12.3305	73.913	33.4146	9.98752	35.9177	1.68	1.77706	36.7415	2.17938	0.495868
161	16.0243	14.1017	5.40365	2.64687	12.1034	4.02439	1.74781	1.26582	1.36	2.42326	1.16376	0.502932	0.661158
162	15.7286	21.4424	25.1953	6.52034	21.0341	18.1707	5.49313	21.6772	-3.12	-0.807755	27.7639	-2.17938	-1.4876
163	59.1794	73.0844	66.2109	66.1717	83.4313	73.9024	74.407	131.329	132.88	122.132	126.85	145.18	131.405
164	18.464	31.6162	7.7474	2.00129	29.0247	15.8537	-0.998752	36.3924	-1.68	-0.323102	67.3317	-1.00587	-1.32231
165	20.3732	25.821	26.4974	8.84441	13.866	20	8.11486	9.81012	5.2	-1.93861	22.6101	8.54987	-1.4876
166	15.2959	23.7605	3.71094	5.10006	19.9765	2.19512	3.995	-0.316455	1.36	0.323101	-1.66251	1.00587	-0.661157
167	19.6213	20.1545	11.5234	3.80891	16.5687	12.1951	3.995	35.443	-0.72	0.484652	37.074	-1.84409	0
168	17.097	19.6394	4.23177	1.09748	18.4489	3.78049	4.36954	1.26582	-0.72	-1.93861	1.99501	-0.502934	-0.165289
169	19.0476	21.5711	1.75781	8.32795	16.2162	3.90244	2.24719	15.5063	1.84	0.484652	27.4314	2.17938	-7.60331
170	17.097	27.2376	5.40365	1.35571	21.0341	3.78049	2.99625	1.58228	-1.04	0.16155	0.997506	0.167645	1.98347
171	24.3259	18.7379	3.32031	3.93802	9.2832	5.97561	3.995	8.86076	2.48	2.26171	13.6326	9.89103	-8.26446
172	23.5227	15.0032	10.7422	5.61653	14.1011	7.43902	6.11735	19.9367	1.04	0.484652	24.7714	2.34702	1.81818
173	15.0617	13.4578	6.44531	1.87217	8.34313	5	8.73907	30.3798	0.56	-0.323102	29.9252	-1.17351	0.826446
174	16.2963	18.4804	15.9505	4.32537	18.4489	16.8293	4.24469	49.3671	-0.56	-0.323102	55.8603	-0.838222	-0.330579
175	16.0969	22.7302	7.61719	5.22918	18.0964	6.46342	4.36954	21.3608	4.24	1.77706	22.1114	3.52054	1.98347
176	17.31	17.7077	20.8984	6.13299	16.9213	17.1951	5.49313	64.8734	12.4	2.42326	78.803	10.8969	1.15702
177	18.5163	18.3516	3.71094	2.51776	12.8085	2.56098	1.87266	11.2342	-0.0799999	-0.484654	15.6276	-1.67644	-0.826446
178	22.4402	22.7302	6.05469	6.77857	16.6863	3.29268	3.49563	1.1076	0.88	0.16155	2.16126	-1.17351	-0.330579
179	15.2054	11.5261	15.4297	4.19626	9.04818	16.3415	1.9975	2.05696	-1.2	0	4.48878	-0.838222	0
180	23.6665	-0.321957	23.3724	3.42156	-5.17039	20.6097	3.37079	11.5506	38.32	0.323101	18.4539	55.1551	0.330579
181	15.0828	15.0032	16.7318	14.1381	10.4583	16.2195	7.61548	24.5253	13.52	0.807753	28.9277	16.0939	0.826446
182	22.5629	23.8893	2.40885	4.45449	21.7391	3.29268	4.24469	0.158227	-0.4	0.807753	-0.831255	0.502932	-1.65289
183	19.5574	2.64005	2.92969	-2.00129	3.64277	-5.60976	3.995	0.474683	1.2	0.969305	0.665004	0.670577	0.330579
184	15.012	10.2383	4.23177	6.26211	7.52056	4.26829	3.1211	2.05696	0.399999	0.646204	2.66002	1.67644	-0.661157
185	15.8768	1.99614	0.585937	2.9051	4.58284	-4.7561	-10.1124	2.68987	3.92	-0.969306	-5.32003	-0.502934	7.27273
186	15.0474	6.24598	0.716146	0.839253	0.470035	1.58537	2.37203	1.26582	-0.4	-0.646204	2.16126	1.67644	0.826446
187	16.1677	17.8364	5.14323	3.29245	9.98825	2.80488	2.87141	-1.89874	11.6	-0.323102	1.16376	3.18525	0.165289
188	20.7186	15.132	2.92969	3.80891	12.2209	3.53659	4.36954	4.11392	0.56	-0.484654	5.15378	-0.167646	2.64463
189	18.4431	8.56407	15.9505	4.32537	5.87544	13.7805	3.24594	1.42405	-1.36	1.77706	0.498752	-0.335289	0.661158
190	17.3653	16.4198	6.96615	6.52034	14.3361	8.90244	4.61923	4.43038	-0.0799999	1.13086	5.81879	1.84409	0.330579
191	24.6707	24.4044	7.48698	4.84183	17.0388	6.46342	4.99376	1.89873	1.84	0.969305	3.49127	-0.335289	0.495868
192	16.7665	19.897	16.3411	4.19626	16.9213	12.3171	7.74032	1.58228	0.24	0.484652	0.498752	0.33529	1.15702
193	15.0175	10.8822	6.3151	6.64945	9.75323	3.65854	3.62047	2.8481	0.88	0.323101	1.99501	0.838223	0.826446
194	19.3248	12.2988	16.4714	4.71272	7.28555	15.122	0.499375	71.2025	1.36	1.93861	79.8005	3.18525	1.4876
195	16.0652	14.6169	10.3516	6.13299	11.3984	8.29268	2.24719	4.43038	1.2	0.807753	2.66002	2.01173	0.991735
196	15.3667	16.8062	6.57552	4.06714	13.9835	6.09756	3.24594	6.32911	1.36	-0.161551	8.1463	1.84409	-0.330579
197	15.9488	15.6471	4.23177	3.93802	14.4536	5	2.12235	4.58861	-0.4	0.323101	6.81629	0.670577	0.495868
198	19.674	25.9498	6.1849	4.97095	24.5593	5.85366	-0.124844	6.01266	0.56	0.16155	6.98254	2.01173	-1.4876
199	19.8431	16.1623	11.3932	6.90768	12.8085	8.41464	6.2422	3.79747	1.04	1.45396	5.15378	1.67644	1.98347
200	19.3946	16.8062	6.70573	3.03422	13.9835	6.34146	4.24469	3.9557	1.36	-0.807755	2.82627	2.68231	-0.661157
201	18.6747	11.2685	13.0859	0.322789	4.93537	3.53659	2.74657	11.076	1.68	-1.13086	6.48379	0.502932	0.330579
202	18.3461	24.662	1.6276	-0.0645578	16.2162	-0.487804	1.37328	2.37342	0.0799999	-0.161551	7.31504	-0.335289	1.15702
203	26.4513	21.4424	8.13802	3.93802	22.2092	7.19512	2.99625	0.632911	1.04	0.646204	3.65752	-0.167646	0.330579
204	15.3888	14.2305	6.96615	5.22918	11.7509	7.07317	5.49313	3.16456	2	-0.646204	0.498752	1.84409	1.32231
205	15.2793	17.9652	6.96615	4.19626	12.8085	4.02439	3.62047	19.3038	-1.04	-0.807755	34.9127	0.838223	0.991735
206	20.1814	15.7759	1.88802	4.84183	13.866	5.60976	4.86891	2.05696	-0.72	0.16155	4.65503	0.33529	0
207	19.0097	23.8893	4.23177	4.84183	17.8613	6.82927	4.36954	-0.949368	0.72	0.969305	1.16376	0.670577	0.826446
208	26.181	28.1391	6.3151	3.42156	20.2115	8.90244	5.36829	1.58228	1.52	0.969305	1.16376	1.5088	0.495868
209	20.6033	19.6394	4.6224	2.51776	12.691	3.17073	1.37328	3.00633	-0.0799999	0.16155	3.82377	0.33529	-0.495869
210	20.5257	19.2531	6.83594	1.74306	12.1034	5.60976	3.37079	3.79747	1.36	0.16155	3.65752	2.17938	-0.495869
211	25.1119	23.6317	4.7526	2.9051	19.624	5.12195	2.87141	26.1076	2.96	0.646204	28.0964	2.51467	1.15702
212	15.4728	15.7759	7.22656	1.74306	11.3984	7.07317	2.24719	0.949366	0.88	-0.484654	-0.665005	0.167645	-0.991735
213	16.4444	20.2833	3.84115	2.77598	13.396	3.41463	3.1211	0.949366	0.72	0.484652	0.997506	1.17351	-0.330579
214	15.8889	19.6394	4.88281	1.87217	13.631	2.92683	0.99875	3.16456	-0.240001	-0.484654	2.16126	1.17351	-1.98347
215	16	15.0032	9.3099	6.90768	11.6334	12.0732	4.49438	5.85443	2.64	1.77706	4.15627	2.01173	0.330579
216	15.011	9.72312	9.83073	6.77857	8.46063	7.80488	8.48939	8.70253	4.4	2.42326	14.2976	3.35289	-0.165289
217	17.66	17.7077	4.49219	-0.322788	17.0388	3.04878	0.624219	-0.791141	2	-0.161551	-0.332502	1.67644	0.661158
218	26.7108	46.1687	2.27865	3.67979	41.4806	1.21951	7.24095	5.06329	0.88	-0.646204	5.81879	1.00587	0.165289
219	45.3642	43.7218	-5.79427	1.2266	46.2985	3.78049	3.74532	2.37342	1.04	-0.323102	1.33001	1.00587	0.330579
220	16.696	22.2151	5.92448	2.38864	14.2186	5.12195	3.74532	-1.26582	-0.240001	0.323101	-2.49377	0.33529	0.165289
221	15.0556	-1.35222	3.1901	2.9051	-4.46533	2.80488	3.62047	9.49367	0.0799999	0.646204	9.97506	1.17351	0.661158
222	17.7866	16.935	4.10156	4.84183	12.926	5.2439	3.74532	6.32911	1.68	0.323101	11.8038	2.17938	0.165289
223	17.109	17.3213	3.71094	4.84183	12.5734	5.2439	4.11985	0.474683	1.04	1.13086	0.498752	1.00587	0.826446
224	15.1892	18.6091	5.92448	3.55068	17.5088	9.87805	5.36829	3.9557	0.56	0.969305	3.49127	2.34702	-0.495869
225	21.0616	23.3741	3.71094	2.25952	14.5711	1.34146	0.873907	4.27215	-1.2	-0.484654	4.98753	-0.502934	-1.15702
226	17.3348	17.3213	4.88281	1.35571	13.7485	2.80488	2.62172	1.1076	0.399999	0.807753	7.98005	1.00587	0.495868
227	20.0115	24.1468	4.49219	3.93802	21.5041	0.853658	0.749063	-0.949368	0.56	0.16155	0	0.33529	1.4876
228	15.7683	22.3438	2.66927	2.77598	21.0341	3.17073	2.74657	0.474683	1.84	-0.323102	-0.498753	-0.167646	0.661158
229	16.3418	17.5789	3.32031	5.74564	15.8637	3.04878	1.12359	10.7595	-0.4	1.29241	18.9526	0.502932	0.330579
230	23.398	17.3213	7.09635	4.32537	13.0435	6.46342	3.37079	6.01266	1.04	0.807753	3.65752	1.17351	-0.330579
231	15	11.2685	9.44011	4.71272	5.2879	9.7561	4.24469	1.1076	-0.4	-0.323102	4.48878	0.838223	0.991735
232	21.1364	26.5937	10.4818	6.52034	19.2714	9.39025	5.36829	0.158227	-0.240001	-0.646204	0.332502	0.670577	0.661158
233	16.0227	11.6549	12.9557	2.9051	5.75793	13.9024	0.873907	25.4747	13.2	-0.484654	29.2602	20.285	0.661158
234	15.991	21.1848	13.4766	1.2266	17.1563	13.4146	4.61923	38.6076	-1.2	-0.807755	39.9002	-0.502934	0
235	18.5811	26.8513	3.0599	1.2266	18.5664	4.14634	3.37079	1.1076	1.04	1.13086	3.15877	1.00587	0.330579
236	15.8784	17.9652	2.01823	1.74306	13.2785	3.90244	3.87016	2.21519	0.72	0.807753	3.99003	0.838223	0.165289
237	19.3694	19.897	13.6068	3.80891	15.2761	15.3659	5.24345	62.9747	-1.36	1.45396	68.3292	-0.838222	0.826446
238	30.5183	28.9118	7.22656	3.93802	27.6146	7.80488	4.74407	27.6899	1.04	0	37.739	1.00587	0.826446
239	15.9581	22.4726	4.6224	4.45449	16.9213	5.4878	3.62047	4.43038	0.24	-0.161551	7.14879	1.00587	1.32231
240	21.1979	42.1764	47.7214	59.0704	39.3655	53.6585	67.9151	30.538	70.8	123.425	25.6027	74.2665	122.479
241	17.8653	25.0483	5.14323	2.25952	17.6263	3.29268	1.49813	18.038	0.399999	-0.807755	21.4464	1.34116	-0.330579
242	16.5184	16.4198	4.49219	2.9051	11.7509	4.7561	0.249686	5.06329	-0.56	0.16155	7.4813	0.33529	-0.495869
243	17.1858	20.9272	3.84115	2.51776	19.5065	-3.53659	1.87266	6.01266	0.88	0.323101	6.48379	1.5088	0.165289
244	16.4788	27.7527	11.9141	3.16333	17.2738	13.6585	1.24844	2.05696	1.2	0.807753	1.33001	1.5088	0.661158
245	18.5185	-1.35222	7.61719	3.93802	-6.11046	3.17073	1.49813	6.32911	-1.36	-0.323102	7.98005	-1.00587	-0.330579
246	60.0644	-11.6549	1.23698	15.8166	-15.5112	4.87805	0	-3.48101	0.56	0.807753	-5.32003	1.34116	0.165289
247	19.0649	18.4804	4.6224	4.19626	13.2785	4.7561	4.24469	2.53165	-0.4	-0.807755	2.16126	0.838223	0.165289
248	16.9609	16.8062	9.3099	4.84183	11.5159	7.31707	2.99625	3.63924	-0.240001	0.16155	8.64505	1.00587	0.495868
249	18.0097	5.3445	22.7214	1.61394	3.40776	19.8781	-0.873907	49.0506	1.84	-0.323102	48.2128	3.52054	-0.165289
250	17.3607	20.5409	1.10677	1.87217	18.5664	0.731706	0.499375	0.949366	0.88	0.969305	-0.166252	1.84409	0.495868
251	16.4507	23.1166	1.6276	1.61394	31.2573	5.4878	3.1211	0.158227	-0.0799999	-0.161551	-1.16376	-0.167646	-0.330579
252	15.2113	26.3361	6.57552	1.87217	24.7944	4.63415	4.24469	1.89873	0.56	1.13086	1.33001	0	0.495868
253	15.2113	18.4804	8.13802	3.42156	14.3361	5.85366	3.74532	12.3418	0.0799999	1.45396	16.6251	-0.335289	0.330579
254	15.9179	14.2305	8.13802	4.97095	12.4559	9.63415	0.99875	-1.1076	2.96	0.969305	-1.49626	1.5088	1.4876
255	15.0305	16.5486	5.53385	5.10006	9.87074	5.36585	4.61923	1.1076	0.88	0.16155	1.49626	1.00587	2.14876
256	16.9163	20.6697	9.96094	4.19626	18.0964	9.14634	6.74157	7.43671	1.2	0.807753	9.47631	0.33529	0.495868
257	16.6944	26.0786	3.71094	2.25952	22.0917	0.487805	0.749063	-0.949368	0.0799999	-0.323102	-0.498753	0.502932	0.495868
258	15.1414	21.4424	3.32031	3.80891	13.0435	3.65854	0.624219	0.316454	0.399999	-0.646204	-0.831255	2.17938	0.495868
259	19.1667	28.3967	3.58073	2.38864	20.4465	3.04878	0.249686	7.91139	0.399999	-0.484654	9.97506	0.502932	-0.165289
260	15.7377	17.0637	5.14323	1.48483	9.98825	1.09756	1.87266	0.632911	-1.04	0.16155	0.498752	-0.167646	0.165289
261	18.9071	24.2756	3.71094	2.25952	18.8014	2.92683	4.11985	10.9177	-0.0799999	1.29241	13.3001	1.84409	0
262	15.9563	18.9955	4.10156	2.25952	17.3913	0.609757	1.49813	25.6329	0.72	-1.13086	29.7589	1.17351	-0.330579
263	16.1749	19.2531	17.7734	4.5836	16.9213	15.6098	3.87016	23.1013	-2.32	-0.484654	24.4389	-1.67644	-0.991735
264	17.1585	25.9498	7.48698	3.42156	21.3866	3.78049	3.24594	4.43038	-0.240001	-0.161551	8.4788	0.33529	-0.495869
265	24.1816	19.897	20.5078	0.322789	17.2738	18.1707	-0.998752	23.4177	2.8	-0.161551	27.9302	3.0176	-0.330579
266	15.3115	19.1243	18.2943	1.35571	16.8038	15.9756	0.499375	64.7152	-0.0799999	-0.969306	70.6567	0.33529	0.661158
267	16.9536	18.8667	6.3151	2.38864	19.2714	5.4878	1.87266	-0.791141	0.72	0.646204	0.498752	0	-0.330579
268	15.18	14.1017	3.58073	2.77598	13.631	4.14634	3.87016	2.53165	-0.240001	0.646204	3.82377	0.838223	-0.495869
269	15.2843	18.8667	6.83594	2.77598	20.329	6.34146	3.62047	3.9557	0.24	-0.484654	5.65254	0.167645	-0.661157
270	15.2843	26.98	3.58073	4.06714	23.7368	4.87805	3.87016	0.316454	1.36	0.646204	-0.831255	0.670577	-0.165289
271	15.2843	17.8364	5.53385	3.29245	16.5687	6.09756	3.1211	3.48101	0.88	1.61551	3.32502	0.838223	0.495868
272	17.2309	17.1925	17.6432	7.94061	21.3866	17.8049	9.98752	13.1329	4.4	1.13086	15.7939	2.84996	1.81818
273	16.5054	17.5789	2.92969	2.00129	12.5734	3.17073	0.249686	2.8481	-0.240001	0	4.65503	0	0
274	18.0774	11.5261	8.13802	3.29245	7.75558	8.17073	3.74532	33.2278	-1.36	-0.969306	38.9027	0.167645	1.32231
275	18.4401	27.8815	4.49219	2.9051	14.5711	2.92683	2.49688	1.1076	-0.56	-0.161551	2.66002	0.670577	0.495868
276	19.6493	17.4501	5.14323	2.51776	15.6287	6.34146	1.24844	19.7785	0.72	-1.45396	29.7589	2.17938	-0.330579
277	17.11	19.5106	7.48698	4.71272	12.2209	10.122	3.87016	1.89873	-1.04	0.484652	0.831255	-0.167646	0.495868
278	16.3238	24.2756	22.0703	11.9432	18.9189	19.2683	13.1086	9.17722	7.92	4.03877	8.64505	11.5675	4.95868
279	14.9967	9.20799	7.8776	3.67979	4.46533	7.19512	2.49688	-2.68987	-0.880001	1.61551	-2.66002	-1.17351	0.330579
280	18.8454	14.2305	11.263	5.61653	4.93537	11.2195	4.24469	13.2911	1.68	-1.13086	10.3076	2.01173	1.32231
281	15.274	9.98068	13.0859	-1.09748	7.28555	13.6585	-0.998752	10.2848	1.84	-1.77706	13.3001	-2.17938	-0.330579
282	18.0137	9.98068	6.44531	3.67979	5.40541	1.46341	1.37328	1.58228	0.0799999	-0.807755	0.831255	1.34116	0.826446
283	17.8767	12.6851	8.26823	2.13041	8.81316	8.41464	2.37203	25.4747	-2.32	0	32.5852	-2.84996	-0.826446
284	15.3633	19.5106	13.8672	3.42156	24.3243	10.122	2.87141	5.53797	-0.0799999	0.323101	4.15627	2.51467	1.32231
285	19.7924	20.7985	6.57552	4.32537	13.9835	4.87805	4.11985	2.8481	0.399999	0.646204	2.66002	0.838223	0.165289
286	21.5917	26.98	12.0443	4.97095	23.1492	10	7.49064	9.33544	1.52	1.45396	10.4738	2.01173	1.98347
287	15.0865	8.04894	3.84115	2.77598	5.17039	3.17073	3.74532	9.01899	0.24	1.13086	10.6401	0.670577	1.32231
288	19.348	19.6394	5.14323	3.67979	19.2714	4.14634	3.37079	0.949366	0.88	-0.323102	3.15877	0.33529	0.661158
289	19.6315	15.6471	4.6224	3.80891	11.0458	2.19512	1.24844	0.316454	-0.880001	-0.484654	-0.498753	-0.670578	-0.165289
290	18.0723	17.8364	3.1901	2.51776	20.094	3.04878	3.87016	7.43671	1.04	0.484652	7.64755	1.5088	1.81818
291	15.6626	21.5711	4.6224	1.2266	18.5664	1.95122	2.62172	3.63924	-0.0799999	-0.161551	2.82627	1.00587	0.165289
292	15.3524	12.0412	5.40365	2.64687	11.1633	7.80488	1.62297	4.90506	-0.72	-0.807755	4.32253	1.17351	0.661158
293	26.3782	28.2679	12.4349	3.93802	26.792	8.41464	3.995	8.38608	1.36	0.646204	5.15378	1.67644	0.661158
294	17.8646	14.2305	2.53906	6.00387	13.5135	3.41463	1.62297	12.0253	0.24	-0.161551	17.6226	1.67644	0.991735
295	17.8926	18.4804	19.3359	3.03422	16.9213	18.9024	3.1211	35.7595	0.56	0.16155	48.8778	1.17351	0.495868
296	17.8926	18.7379	8.39844	4.06714	14.8061	4.26829	3.24594	4.74683	-0.880001	0.969305	4.48878	1.5088	1.4876
297	20.4109	6.50354	5.66406	2.00129	2.11516	9.63415	0.499375	5.22152	1.36	0.323101	9.31006	1.84409	0.991735
298	18.6879	16.1623	1.75781	2.77598	11.3984	1.21951	3.1211	3.48101	-0.4	0.484652	3.32502	2.01173	0.661158
299	17.495	18.7379	12.6953	14.5255	25.0294	20.1219	16.1049	6.32911	3.6	1.45396	5.98504	2.84996	2.31405
300	25.9025	24.018	3.71094	1.48483	20.329	0.487805	2.24719	7.12025	0.72	0.323101	3.32502	0.33529	0.495868
301	16.5295	22.4726	12.3047	9.48999	17.9789	9.7561	8.48939	3.63924	0.56	1.29241	1.49626	1.5088	1.4876
302	16.8911	23.6317	14.388	6.52034	15.1586	13.2927	5.36829	3.79747	1.68	0.323101	3.32502	2.84996	1.98347
303	16.4863	14.6169	5.92448	3.42156	12.4559	6.21951	2.62172	5.53797	0.56	0.16155	7.64755	1.00587	0.330579
304	23.2062	19.897	2.53906	4.19626	17.5088	4.87805	4.11985	0.632911	0.88	-0.161551	0.665004	0.838223	0.165289
305	15.4493	12.6851	5.14323	2.38864	11.7509	3.41463	1.74781	5.06329	-0.880001	-1.13086	1.82876	1.5088	-0.991735
306	28.2595	32.7753	8.39844	4.84183	27.6146	1.21951	3.74532	0.632911	1.36	-0.807755	0.997506	1.17351	-0.661157
307	15.6712	21.5711	7.35677	3.93802	17.9789	5.2439	2.37203	6.64557	1.36	-0.161551	8.31255	0.167645	0
308	30.4693	38.8281	21.2891	6.26211	30.7873	17.1951	0.624219	4.74683	0.0799999	1.13086	3.49127	1.5088	-0.330579
309	18.9394	19.897	4.6224	6.39122	15.7462	5.12195	2.87141	2.05696	-0.4	0	7.98005	1.00587	-0.165289
310	22.4748	34.3207	29.7526	7.55326	33.49	18.4146	4.74407	0.949366	0.0799999	-0.969306	0.665004	0.167645	-0.991735
311	17.803	22.4726	5.79427	3.80891	22.2092	4.87805	2.62172	8.06962	1.68	0.484652	10.6401	1.84409	-0.661157
312	16.8927	25.6922	1.23698	2.51776	22.4442	3.78049	4.36954	6.48734	1.52	-0.484654	5.65254	0	0.165289
313	16.0296	9.20799	8.91927	1.35571	7.40306	6.58537	-0.749065	9.49367	1.68	0.484652	9.14381	1.84409	-0.165289
314	19.6127	18.094	8.26823	1.35571	18.2139	6.34146	1.12359	35.6013	-1.36	-0.323102	44.389	-0.670578	0.661158
315	17.7389	20.1545	2.27865	1.74306	15.9812	3.17073	2.12235	5.85443	-1.2	0.969305	10.9726	-0.502934	0
316	22.4859	24.018	6.57552	2.64687	19.389	5.2439	1.62297	26.7405	-0.72	0.646204	37.9052	-1.5088	0.826446
317	17.4891	23.3741	3.71094	3.93802	18.4489	4.5122	2.12235	-0.791141	-0.240001	0.969305	-0.997506	1.67644	0.991735
318	20.737	27.4952	5.27344	3.55068	22.7967	4.26829	1.62297	2.37342	-0.240001	-0.807755	5.15378	-0.838222	-0.826446
319	16.9894	23.8893	3.97135	2.13041	20.329	4.26829	2.99625	10.6013	0.56	-1.13086	19.6176	0.838223	0.165289
320	17.2392	20.5409	2.40885	4.32537	19.5065	3.78049	3.1211	2.68987	-0.4	0	1.49626	0.838223	-0.826446
321	15.4172	14.0026	1.36816	1.68703	17.9275	3.45036	1.64141	2.28013	1.40962	0.166528	4.44444	-1.23675	-0.614034
322	17.4728	8.63171	9.95025	0.988948	6.61157	12.6513	-0.126263	1.9544	1.57546	2.16486	0.493827	-0.353357	-2.7193
323	18.5611	-12.8517	14.1791	6.45724	-0.381438	20.6416	2.90404	4.23453	1.07794	-0.666112	6.58436	6.36042	0.614036
324	19.0447	11.5729	3.60697	17.8592	18.9447	-0.544795	1.64141	4.88599	0.248757	10.1582	9.0535	-1.41343	0.263158
325	15.8204	-14.2583	5.72139	0.756254	-14.2403	9.38257	0.378789	-3.4202	0.912107	0.499583	-4.60905	1.23675	0.263158
326	19.5396	21.1637	0.621892	2.15242	22.5048	-1.63438	0.50505	5.70033	2.40464	1.99833	7.07819	0	0.789474
327	15.2303	2.74936	0.497513	-0.639906	4.4501	0.907989	0.252526	1.30293	-1.07794	-0.166528	1.31687	-1.94346	-0.263158
328	19.9851	13.3632	2.98508	0.988948	17.6732	2.23971	-1.76768	0.325732	0.0829191	0	2.13992	-0.353357	1.84211
329	15.2303	11.7008	9.0796	1.22164	10.0445	7.20339	1.38889	4.56026	0.0829191	1.99833	3.12757	1.94346	0.789474
330	19.3908	6.4578	9.32836	3.08319	14.876	3.81356	5.93435	3.09446	2.23881	1.16569	3.6214	1.76678	0.964913
331	15.9733	10.9335	5.59701	2.26876	14.2403	6.35593	1.0101	1.30293	0.414594	1.33222	0.823045	-0.530036	0.0877188
332	17.162	15.665	8.58209	2.96684	15.3846	6.59806	1.76768	3.42019	1.90713	0.832639	6.74897	0.883391	1.14035
333	16.7198	13.1074	13.1841	4.363	15.1303	13.3777	4.16667	3.42019	0.74627	2.33139	2.46914	1.94346	0.263158
334	15.7643	14.2583	0.995025	0.52356	17.2918	2.23971	0.757576	3.09446	0.74627	0.333057	0.823045	-0.353357	0.0877188
335	17.9936	10.8056	1.49254	2.50145	15.5118	4.66102	2.27273	3.74593	0.74627	1.16569	3.6214	-0.176679	0.789474
336	19.9045	12.468	-0.497511	1.68703	14.7489	3.3293	3.40909	-0.162867	1.40962	0.166528	0.987653	-1.23675	1.49123
337	15.0762	7.99233	2.23881	1.33799	10.2988	1.75545	0.50505	1.79153	0.580433	0.499583	4.11523	0	-0.0877188
338	15.5573	6.4578	3.10945	3.43223	11.6974	-0.786926	-0.126263	1.14006	-0.580431	0.832639	1.97531	-1.94346	-0.0877188
339	16.8404	8.12021	4.60199	1.22164	9.28163	7.08232	0.126263	-0.162867	1.07794	0	-1.31687	2.12014	0.789474
340	16.0385	6.4578	5.59701	2.15242	7.37444	3.08717	0.126263	-1.4658	0.912107	1.49875	-1.8107	-0.706714	1.14035
341	15.8781	7.73657	3.85572	0.52356	11.8245	2.60291	1.13637	0.814332	0.74627	0.166528	2.13992	0	0.0877188
342	19.2462	9.2711	6.71642	-0.523559	8.51876	2.23971	3.0303	-0.162867	-0.248755	1.16569	1.64609	-0.176679	1.66667
343	17.1612	6.4578	1.74129	0.639907	8.13732	5.75061	0.631313	2.76873	2.23881	1.16569	1.8107	1.94346	0.964913
344	20.3689	9.91049	2.48756	3.43223	12.206	1.27119	0.50505	2.28013	0.74627	0.499583	2.79835	-0.883392	1.14035
345	18.9254	6.4578	2.73632	0.407215	8.6459	2.9661	3.0303	4.88599	1.74129	0.166528	2.46914	-0.176679	1.14035
346	17.482	5.56266	0.995025	1.45433	6.86586	-0.423729	6.56566	0.162867	0.414594	0.666111	1.97531	-0.706714	0.263158
347	16.1989	6.4578	6.46766	1.68703	6.35728	7.44552	2.77778	1.62866	0.580433	2.83098	1.8107	0.883391	0.263158
348	23.5766	11.0614	4.85075	5.52647	11.0617	4.05569	2.90404	1.9544	1.24378	-0.166528	2.13992	-0.706714	0.964913
349	17.1612	6.07417	1.74129	0.407215	7.88302	4.17676	2.14647	1.62866	0.248757	0.832639	0.823045	0.176677	0.438598
350	16.3593	-11.5729	5.72139	3.43223	-8.90019	5.26635	3.66162	3.42019	0.912107	1.16569	2.63374	0.353356	-0.614034
351	19.0858	8.63171	4.35323	1.68703	11.316	5.02421	2.39899	1.9544	1.57546	1.66528	2.13992	1.59011	0.614036
352	15.0762	7.22506	3.85572	1.45433	8.6459	7.92978	3.0303	1.62866	-1.07794	1.49875	0	1.41343	0.263158
353	17.1612	6.96931	1.74129	1.91972	7.62873	1.99758	0.883838	1.30293	1.07794	-1.33222	1.8107	0.530035	-0.438597
354	16.0385	6.71356	3.9801	2.03607	6.48442	3.93462	2.0202	3.42019	1.07794	2.49792	4.27984	0.530035	-0.0877188
355	17.9631	9.14322	3.35821	0.407215	7.12015	3.69249	0.883838	-0.977199	-0.0829179	0.832639	-1.31687	1.23675	2.01754
356	17.9631	9.65473	3.85572	3.43223	14.4946	1.63438	1.38889	0.814332	-0.248755	6.16153	1.15226	3.71025	0.438598
357	19.4066	9.91049	2.61194	1.57068	7.88302	2.72397	2.0202	0.651465	-0.414593	0	-0.16461	-0.706714	-0.0877188
358	20.5293	14.3862	1.36816	12.6236	18.0547	0.544794	3.0303	1.9544	0.0829191	-1.49875	0.164608	0.530035	-0.789473
359	21.4916	8.50384	1.61692	1.68703	12.206	0.302663	0.252526	0.814332	-1.40962	1.16569	0.987653	0	0.0877188
360	17.0008	6.96931	3.35821	2.8505	9.79021	-1.39225	0.378789	0.162867	0.414594	-0.333056	0.823045	-0.706714	0.263158
361	21.3312	9.65473	1.36816	1.33799	9.91736	1.75545	3.15657	1.9544	-0.746267	-0.832639	1.97531	0.353356	1.84211
362	16.0385	10.6777	2.8607	1.68703	8.90019	1.15012	6.94444	1.62866	0.580433	0.166528	0.493827	-0.706714	-0.0877188
363	16.3593	6.84143	5.47264	2.38511	10.4259	6.477	5.05051	1.30293	-1.24378	-0.166528	3.12757	0.706712	1.49123
364	31.4354	17.4552	6.21891	3.43223	17.8004	5.14528	3.78788	3.90879	2.07297	1.33222	6.25514	-0.176679	0.438598
365	16.68	7.48082	3.73134	0.52356	13.2231	4.05569	3.28283	3.25733	0.248757	1.66528	5.26749	1.06007	0.438598
366	16.68	12.9795	4.22886	0.756254	16.5289	4.53995	3.15657	1.9544	0.248757	2.33139	1.48148	0.353356	0.0877188
367	20.5293	17.9668	5.97015	2.50145	19.4533	9.50363	2.65151	4.07166	0.74627	2.16486	4.93827	1.59011	0.789474
368	19.567	13.7468	4.22886	3.08319	18.5633	4.05569	3.53535	4.07166	0.580433	0.666111	3.29218	1.41343	0.964913
369	15.5573	11.8286	4.85075	1.80337	9.66306	5.50847	2.52525	7.98046	0.414594	-0.499584	9.21811	0	0.614036
370	18.765	11.7008	5.84577	2.50145	11.316	2.11864	0.757576	7.00326	0.912107	0.832639	7.73663	0.353356	0.614036
371	17.0078	4.7954	3.9801	-0.0581728	4.4501	5.50847	1.0101	11.8893	1.40962	-0.166528	11.5226	2.12014	0.263158
372	15.4552	14.2583	4.22886	2.38511	22.7591	5.02421	2.52525	2.11726	-0.414593	0.333057	2.13992	0	0.438598
373	16.1609	11.0614	3.35821	1.91972	13.8589	2.9661	2.14647	2.9316	-0.580431	-0.499584	5.10288	-0.176679	0.0877188
374	16.4432	9.39898	3.48259	0.290868	10.9345	0.544794	1.64141	0.488599	0.74627	0.499583	1.15226	0.176677	-0.263158
375	17.0078	13.1074	4.10448	-4.363	16.1475	0.66586	1.51515	2.9316	1.40962	1.83181	2.46914	1.76678	0.789474
376	16.4432	11.0614	2.61194	1.33799	12.7146	2.36077	1.51515	2.76873	-0.912105	-0.166528	0.658436	-1.23675	0.0877188
377	19.266	11.445	1.49254	-0.639906	8.6459	3.93462	2.39899	2.443	1.74129	0.499583	1.15226	0.176677	0.964913
378	18.7015	8.12021	3.10945	2.96684	10.2988	3.08717	6.18687	2.11726	1.24378	0.333057	3.12757	1.76678	0.964913
379	16.5843	14.2583	6.8408	4.363	16.0203	9.01937	4.79798	2.76873	0.414594	1.49875	2.63374	1.41343	1.49123
380	17.4312	20.3964	7.21393	3.43223	20.2161	5.14528	3.28283	1.30293	0.248757	1.99833	2.96296	1.06007	0.263158
381	15.8786	7.99233	8.08458	3.31588	8.51876	7.68765	4.79798	5.86319	2.40464	0.666111	10.2058	1.76678	1.14035
382	17.1548	11.1893	4.97513	1.57068	9.91736	3.45036	1.26263	2.28013	1.57546	1.83181	2.13992	0.176677	0.964913
383	15.8996	12.9795	0.746268	1.57068	15.3846	5.02421	3.28283	1.4658	0.248757	0.832639	1.8107	0.353356	0.438598
384	16.318	17.711	2.36319	1.80337	23.6491	2.72397	3.91414	0.814332	1.07794	0	1.48148	-0.353357	2.54386
385	24.1611	21.2916	4.22886	2.8505	17.1647	2.36077	1.76768	1.14006	-0.746267	0.166528	2.30453	1.23675	-0.263158
386	16.686	-4.53964	18.5323	3.66492	-2.41577	14.5884	5.30303	8.14332	3.23383	2.9975	10.6996	5.30035	1.14035
387	15.4088	16.9437	2.73632	-0.0581728	16.1475	3.81356	0.252526	6.84039	0.912107	0.499583	6.25514	3.18021	0.438598
388	15.4341	16.688	0.124378	1.45433	14.7489	0.423729	4.92424	14.8209	2.73632	0.166528	14.321	-1.41343	0.438598
389	15.9485	13.2353	0.621892	2.03607	12.5874	1.99758	1.38889	14.8209	-0.0829179	-0.166528	15.8025	2.82685	2.89474
390	17.1061	12.0844	3.10945	1.80337	13.2231	0.66586	0.631313	12.215	1.24378	0.666111	13.0041	-0.176679	0.0877188
391	17.1061	10.0384	-32.9602	-4.01396	11.5702	1.63438	0.252526	12.8665	0.0829191	0.166528	14.321	0	5.35088
392	22.3794	15.9207	4.60199	2.03607	19.9619	3.20823	1.64141	17.9153	0.74627	0.832639	16.9547	0.883391	0.964913
393	20.1929	15.0256	1.1194	-2.96684	20.3433	4.66102	1.64141	16.2866	0.414594	0.832639	16.7901	0.883391	1.14035
394	17.492	7.35294	-0.497511	1.91972	9.28163	-0.181598	6.18687	15.6352	1.40962	0.832639	15.9671	0.883391	0.0877188
395	18.9067	12.9795	6.09453	3.08319	14.4946	6.23487	4.29293	16.2866	0.912107	1.49875	16.6255	1.41343	0.614036
396	17.8778	18.4783	4.10448	3.78127	20.089	2.72397	6.94444	15.9609	1.90713	1.49875	18.107	0.883391	-0.614034
397	21.4193	19.8849	2.11443	0.52356	23.7762	21.7312	2.14647	3.58306	1.40962	2.16486	1.15226	0.530035	-0.964912
398	15.2174	19.757	11.0696	3.31588	19.9619	10.23	4.16667	5.21173	-0.414593	2.33139	5.59671	0.706712	0.614036
399	17.3509	-7.22506	9.82587	4.24666	-8.01017	13.0145	5.68182	37.2964	2.07297	1.33222	46.0905	3.35689	1.49123
400	17.5698	5.56266	1.61692	2.38511	3.81437	4.66102	1.89394	-1.14007	-0.0829179	-0.999166	-0.658436	-0.176679	-0.263158
401	31.6137	37.1483	7.08955	0.756254	50.9854	5.26635	1.38889	0.488599	-0.746267	-0.666112	-0.493828	0	-1.31579
402	22.0734	23.7212	-0.373133	2.38511	26.4463	1.99758	1.13637	8.63192	-0.746267	-0.832639	8.88889	-1.94346	-0.263158
403	19.1613	14.2583	6.34328	0.174521	14.7489	7.08232	0.631313	0.325732	-0.0829179	0	-0.493828	-0.530036	0.964913
404	28.0588	10.1662	6.59204	5.29378	7.12015	7.68765	-0.505049	11.8893	0.580433	1.16569	11.358	2.29682	0.614036
405	22.1959	26.9182	5.0995	0.872601	26.4463	3.69249	3.91414	4.39739	-0.414593	0	4.44444	1.76678	-1.31579
406	15.3939	1.72634	4.97513	1.45433	1.14431	2.23971	2.90404	5.86319	0.248757	0.499583	5.4321	-0.353357	0.0877188
407	22.6667	8.63171	21.1443	-5.99186	5.97584	24.2736	1.76768	1.30293	0.0829191	2.16486	0.164608	0.176677	-0.438597
408	25.9394	23.0818	18.6567	0.756254	23.0133	11.9249	4.16667	1.4658	1.24378	-0.832639	1.8107	1.59011	1.31579
409	15.8788	16.8159	0.746268	-2.38511	23.0133	6.84019	1.76768	42.5081	2.90216	-0.999166	-1.31687	-7.59717	1.31579
410	16	15.5371	3.9801	5.87551	18.8176	1.15012	5.80808	4.39739	0.248757	0.166528	5.10288	-0.883392	0.789474
411	18.4242	-14.5141	8.58209	3.43223	-13.8589	8.8983	3.66162	3.09446	-0.248755	1.16569	2.46914	0.706712	1.31579
412	16.9697	7.73657	5.84577	2.50145	8.77304	4.41889	7.57576	3.58306	-0.248755	1.83181	1.48148	-0.353357	-0.263158
413	24.1212	1.9821	5.97015	1.33799	-0.127146	-4.66102	0.50505	2.11726	-1.24378	1.83181	2.30453	-1.06007	0.263158
414	16.9697	1.08696	1.99005	1.91972	2.92435	1.63438	4.92424	3.09446	0.912107	0.666111	1.31687	0.176677	1.14035
415	17.4087	12.2123	15.4229	0.290868	14.876	15.3148	3.53535	44.9511	-1.40962	1.33222	50.6996	-0.530036	1.14035
416	16.0704	19.1177	2.98508	3.08319	20.7247	5.50847	3.28283	7.49186	-0.912105	-0.832639	8.39506	-0.353357	-0.0877188
417	17.0611	14.6419	3.60697	3.31588	14.4946	4.05569	0.631313	7.32899	-0.580431	-0.499584	10.2058	-1.23675	-0.789473
418	15.41	2.74936	7.46269	0.988948	6.61157	5.02421	1.76768	-1.62866	-0.414593	1.33222	-2.30453	-1.76679	1.31579
419	17.7814	13.7468	2.11443	0.174521	13.4774	2.36077	0.883838	7.16612	1.57546	0.999168	6.91358	1.23675	0.789474
420	19.0949	20.5243	5.84577	3.19954	20.8519	2.60291	1.0101	-1.62866	-0.414593	0.999168	-2.63374	-0.353357	1.49123
421	21.5232	20.78	4.10448	0.639907	20.089	2.60291	1.13637	18.0782	1.40962	0.666111	18.4362	0.883391	1.66667
422	15.9791	19.2455	4.35323	4.01396	16.7832	-0.423729	1.89394	-1.30293	-0.912105	0.832639	0.164608	0.706712	-0.438597
423	113.481	106.713	101.119	34.8458	118.754	101.513	28.4091	96.2541	112.189	3.66361	96.6255	112.544	4.12281
424	15.1533	19.5013	1.49254	7.85341	20.5976	4.29782	2.27273	16.9381	0.912107	1.66528	17.6132	1.41343	2.7193
425	20.7056	29.22	-3.35821	-5.06108	16.5289	-25.8475	5.55556	54.886	4.06302	-1.33222	44.6091	16.0777	0.964913
426	15.6551	16.688	2.23881	4.47935	18.9447	1.75545	4.92424	13.6808	1.24378	1.16569	15.144	1.41343	0.263158
427	18.4649	12.3401	6.09453	3.43223	11.5702	6.35593	16.7929	-0.488599	0.414594	-3.83014	0.987653	3.53357	1.66667
428	15.5684	11.3171	7.58706	4.24666	11.8245	6.1138	6.18687	1.9544	0.74627	1.66528	1.64609	0.883391	-0.0877188
429	22.5059	19.8849	9.20398	4.13031	22.5048	10.7143	4.29293	5.04886	2.23881	-0.999166	3.95062	0.883391	0.789474
430	16.2632	15.665	7.58706	5.52647	16.6561	5.50847	4.29293	2.76873	1.57546	1.83181	2.30453	1.06007	0.964913
431	18.2692	21.9309	0	2.6178	26.192	3.57143	3.0303	-0.651467	0.74627	0.333057	-1.8107	1.23675	1.14035
432	53.9495	60.6777	22.0149	5.64282	68.0229	28.9952	8.58586	7.65472	0.74627	2.16486	4.77366	0.883391	1.49123
433	17.6197	12.7238	3.73134	1.10529	11.8245	3.69249	1.64141	2.60586	0.248757	1.16569	-2.46914	-0.353357	0.789474
434	15.9971	10.5499	5.97015	4.5957	8.51876	3.45036	1.13637	7.32899	1.07794	0.999168	5.76132	-2.82686	1.66667
435	16.4276	10.9335	3.10945	0.639907	13.4774	2.60291	2.52525	3.74593	0.414594	2.83098	4.60905	1.94346	-0.789473
436	21.4467	13.7468	7.71144	2.6178	24.5391	1.63438	4.41919	8.46906	0.580433	1.99833	8.39506	3.00353	1.14035
437	17.5302	12.5959	4.35323	3.19954	11.316	4.66102	3.15657	10.7492	1.57546	1.16569	9.54733	1.06007	1.66667
438	18.5879	16.0486	4.22886	1.45433	14.6217	1.51332	1.51515	16.6124	0.414594	0.999168	15.3086	1.94346	2.01754
439	15.8696	18.8619	18.0348	0.756254	21.3605	12.046	2.0202	-6.51466	0.248757	-2.9975	6.41975	0.530035	1.66667
440	15.0072	14.0026	4.10448	3.66492	14.2403	2.48184	2.65151	11.2378	1.57546	0.832639	12.0165	1.06007	0.614036
441	15.0071	9.65473	-21.8906	-1.68703	17.6732	18.0993	1.13637	14.3323	19.9834	0	21.3992	4.947	0.438598
442	20.0137	15.1534	25.995	2.38511	21.3605	20.2784	6.94444	21.0098	-0.248755	0.499583	22.5514	0.353356	-0.0877188
443	22.4727	7.35294	7.46269	4.47935	7.62873	7.92978	3.66162	35.6677	2.57048	-0.499584	35.7202	1.59011	1.49123
444	19.1207	21.0358	7.9602	5.17743	21.3605	7.20339	5.68182	16.6124	1.24378	2.16486	16.4609	1.41343	2.01754
445	15.6315	24.7443	0.497513	-0.988947	32.4221	4.17676	4.92424	64.0065	14.5108	1.99833	69.6296	-0.706714	-0.0877188
446	16.8304	11.8286	5.59701	4.71204	15.1303	6.1138	4.29293	1.4658	1.24378	0	1.15226	1.23675	0.438598
447	21.9351	17.0716	6.96518	2.6178	20.089	8.65617	4.41919	3.58306	0.912107	0.999168	4.11523	1.23675	0.789474
448	50	70.1407	6.09453	2.8505	80.356	5.99274	7.4495	6.02606	-0.580431	0.999168	5.76132	0.883391	1.66667
449	18.2789	17.711	4.72637	2.6178	16.1475	1.51332	2.65151	22.8013	1.90713	0.666111	24.5267	1.06007	0.0877188
450	20.9989	11.445	3.23383	5.17743	10.0445	1.51332	1.76768	4.23453	0.912107	-2.16486	3.12757	-2.4735	-0.0877188
451	19.1827	11.8286	6.96518	1.80337	19.5804	6.71913	3.40909	3.74593	1.07794	0.333057	6.09053	-0.530036	0.614036
452	15.1464	9.2711	8.20896	4.5957	13.096	4.05569	4.0404	2.28013	1.07794	6.16153	1.64609	0.176677	-0.438597
453	17.5113	9.2711	9.32836	3.43223	10.2988	9.50363	5.42929	1.4658	0.414594	1.99833	1.64609	-0.883392	-0.0877188
454	18.9752	11.1893	5.72139	3.43223	13.7317	1.63438	4.41919	0.162867	0.912107	0	2.63374	-0.353357	0.614036
455	19.1914	34.5908	5.84577	4.13031	12.206	7.56659	3.15657	3.25733	0.248757	-5.49542	2.46914	-0.706714	5.87719
456	17.1259	14.2583	9.20398	3.19954	16.5289	7.68765	4.29293	5.21173	-1.40962	1.16569	3.45679	0.353356	0.438598
457	22.1476	11.0614	10.5721	0.988948	9.15448	12.046	14.899	12.5407	23.3002	25.9783	12.1811	-3.35689	1.66667
458	15.5705	8.75959	-0.62189	4.71204	11.316	-0.544795	7.70202	3.90879	-0.0829179	0.333057	7.07819	0.883391	0.263158
459	21.4765	27.8133	7.46269	6.22455	29.3706	7.92978	6.69192	5.86319	5.22388	2.16486	5.92593	-5.30035	1.84211
460	19.6404	15.2813	9.20398	5.64282	15.2575	8.05085	7.95455	11.4007	1.24378	0.832639	13.4979	0.530035	0.964913
461	20.9407	10.9335	6.59204	2.96684	13.7317	4.41889	5.17677	5.86319	-1.57546	1.49875	3.6214	-0.530036	3.24561
462	19.0077	10.2941	8.83085	3.66492	10.1716	6.1138	6.31313	7.65472	0.414594	1.99833	8.88889	0.353356	1.49123
463	16.0438	8.50384	5.34826	3.66492	9.66306	6.1138	5.17677	3.90879	0.912107	-1.33222	1.31687	1.41343	1.49123
464	16.2939	6.58568	6.96518	4.01396	9.02734	7.08232	9.21717	18.7296	3.39967	1.33222	17.1193	2.29682	0.614036
465	19.4888	9.2711	4.47761	2.96684	11.316	-5.14528	2.39899	1.79153	-0.414593	0.499583	-0.329218	-0.883392	-0.0877188
466	16.7488	12.2123	2.73632	3.08319	11.8245	-1.02906	2.0202	13.5179	1.90713	0.333057	16.9547	-0.176679	0.614036
467	20.2785	15.665	5.47264	2.73415	13.4774	2.72397	3.28283	9.12052	1.40962	1.16569	10.3704	1.76678	1.49123
468	21.8384	5.43478	5.47264	2.26876	12.8417	5.14528	-1.51515	0.325732	-0.414593	-1.49875	-0.658436	2.65017	0.438598
469	16.4014	13.2353	5.84577	2.96684	18.9447	1.99758	4.79798	-0.325733	0.74627	1.33222	-0.987654	1.23675	-0.0877188
470	20.1271	3.00511	3.85572	2.50145	3.81437	2.9661	3.0303	-1.4658	0.0829191	-0.832639	-1.8107	0.530035	0.789474
471	76.9231	85.2302	5.97015	-1.45433	94.7234	28.8741	1.89394	95.9283	-2.07297	1.83181	99.7531	-1.23675	1.66667
472	100.171	101.726	106.841	100.233	114.304	101.634	99.1162	104.397	102.073	157.369	103.704	101.413	166.93
473	20.9302	7.60869	-1.24378	-7.38802	20.979	-18.4625	1.26263	31.9218	-27.4461	-2.66445	14.4856	-8.48057	1.31579
474	15.3137	20.5243	1.86567	-0.174519	22.5048	2.11864	6.81818	-1.9544	-0.248755	0	-2.63374	-1.23675	0.789474
475	17.3432	20.78	4.85075	4.24666	21.7419	8.05085	1.51515	2.9316	-1.24378	0.166528	3.6214	-1.41343	0.438598
476	18.0812	19.757	4.10448	4.363	18.309	4.41889	6.69192	33.3876	0.0829191	-0.666112	35.8848	-2.12014	0.789474
477	22.8354	22.5703	5.72139	5.41012	23.5219	6.59806	4.29293	21.0098	1.07794	3.49709	20.9053	2.29682	1.66667
478	24.1675	19.5013	7.9602	5.17743	21.3605	8.53511	7.32323	18.241	2.07297	3.83014	19.7531	2.29682	0.614036
479	19.2198	10.422	5.34826	3.43223	10.1716	5.02421	5.17677	18.0782	2.73632	-0.333056	19.0947	2.65017	1.31579
480	15.2236	23.8491	4.22886	4.363	26.4463	2.84504	6.43939	-2.9316	0.580433	2.33139	-1.48148	1.06007	0.789474
481	33.4919	19.6291	3.73134	2.8505	17.9275	2.84504	2.27273	26.2215	3.06799	0	26.3375	1.94346	0.964913
482	18.4186	16.1765	7.33831	4.82839	17.0375	3.69249	4.79798	5.37459	1.24378	0.166528	4.60905	-1.59011	0.614036
483	24.3721	15.1534	3.10945	1.80337	12.4603	3.45036	3.15657	15.4723	1.07794	1.99833	14.8148	0.530035	0.614036
484	15.8285	12.468	4.97513	3.08319	19.199	3.69249	-0.126263	3.25733	0.580433	2.49792	2.46914	-2.29682	-0.0877188
485	16.8265	17.9668	4.72637	3.31588	20.2161	4.53995	2.39899	27.5244	0.74627	0.166528	28.1482	-0.530036	1.31579
486	15.6059	26.2788	4.10448	5.64282	23.1405	1.02906	0.631313	-0.651467	-0.580431	0	-1.97531	0.176677	0.789474
487	22.232	26.5345	2.48756	2.50145	25.302	7.20339	3.28283	-13.1922	1.74129	2.33139	-0.823046	-0.883392	-0.0877188
488	23.3304	26.9182	8.70647	7.03898	27.082	8.17191	4.92424	1.30293	1.57546	0.333057	3.95062	3.88693	0.789474
489	18.1656	3.90026	1.49254	-0.174519	31.2778	1.87651	4.16667	21.0098	0.74627	1.99833	-0.16461	-0.176679	0.614036
490	20.837	19.3734	1.49254	6.57359	22.8862	1.75545	5.42929	20.8469	0.248757	-0.832639	22.716	-1.59011	0.0877188
491	15.138	11.5729	5.22388	3.66492	12.0788	5.02421	3.53535	9.60912	0.414594	0.333057	10.0412	2.29682	0.964913
492	19.7755	15.9207	6.46766	5.06108	15.5118	4.29782	6.94444	16.7752	1.57546	1.66528	17.1193	1.23675	1.49123
493	23.4024	19.6291	3.48259	3.08319	17.1647	4.90315	6.18687	7.65472	2.07297	0.999168	5.76132	1.59011	-0.0877188
494	18.2211	13.2353	7.08955	4.71204	15.5118	7.20339	7.82828	8.95765	1.24378	1.66528	9.21811	1.23675	0.964913
495	18.7392	15.1534	2.8607	2.26876	16.1475	4.41889	3.78788	17.101	3.23383	1.49875	18.7654	3.53357	0.263158
496	27.8929	29.7314	8.33333	4.363	29.3706	4.90315	5.42929	-2.76873	0.0829191	0.832639	0.658436	0.353356	0.614036
497	19.7917	11.445	3.23383	3.66492	10.8074	2.23971	3.15657	15.3094	1.07794	-0.333056	16.2963	-0.176679	0.0877188
498	17.1875	14.2583	4.22886	2.8505	15.0032	2.23971	3.0303	1.30293	0.580433	0.333057	-1.8107	-0.530036	0.0877188
499	17.951	11.8286	7.58706	1.80337	12.8417	7.80872	3.28283	8.14332	0.0829191	0.499583	5.4321	-0.353357	1.31579
500	18.3012	14.8977	7.46269	4.363	18.4361	0.786926	2.27273	6.67752	2.40464	1.33222	5.26749	-1.59011	0.0877188
501	18.2684	13.8747	6.71642	3.66492	13.7317	9.50363	5.42929	1.30293	-0.746267	-0.499584	1.31687	-1.41343	1.31579
502	15.0685	18.734	5.0995	3.08319	18.8176	1.27119	6.31313	-2.76873	-0.248755	0.666111	-2.63374	-1.06007	-0.263158
503	16.4384	9.78261	2.36319	4.71204	9.15448	5.38741	2.39899	6.35179	1.57546	4.49625	4.27984	0.883391	2.19298
504	17.4564	16.4322	4.72637	3.66492	15.5118	3.08717	3.15657	11.2378	2.57048	2.16486	10.3704	1.76678	-0.0877188
505	16.2926	11.9565	7.71144	0.872601	11.9517	2.84504	11.4899	15.4723	2.90216	3.33056	14.8148	-1.94346	-0.438597
506	21.0811	20.1407	1.61692	1.22164	20.3433	2.60291	4.29293	-2.443	-0.248755	0.832639	-2.63374	0	-0.614034
507	18.7988	19.757	2.8607	3.89762	22.2505	4.29782	1.0101	-1.62866	0.414594	-0.999166	-1.64609	-0.706714	1.49123
508	16.266	14.8977	1.99005	2.73415	15.3846	-0.060532	3.78788	3.74593	-0.580431	-0.166528	4.27984	-2.65018	0.964913
509	17.1867	22.5703	5.59701	2.8505	20.089	4.41889	5.93435	1.30293	1.24378	1.66528	1.15226	-0.530036	0.789474
510	31.9919	14.3862	8.08458	4.5957	17.8004	5.87167	5.30303	1.4658	0.912107	0.333057	1.48148	1.76678	0.964913
511	17.2529	17.8389	2.8607	3.19954	19.9619	3.57143	5.42929	0.488599	0.580433	-0.333056	0.658436	-0.176679	1.84211
512	17.0296	18.2225	1.61692	3.89762	19.7076	3.3293	5.68182	7.98046	0.912107	-0.333056	7.07819	0.530035	3.94737
513	20.8122	29.7314	22.3881	3.19954	27.4634	22.3366	2.65151	69.7068	5.55556	-0.832639	77.2016	8.65724	-0.438597
514	17.2149	-13.7468	27.7363	7.73706	-14.4946	23.7893	4.92424	-1.9544	13.6816	4.49625	-2.63374	13.6042	2.7193
515	15.8991	21.5473	20.7711	3.89762	23.5219	24.3947	4.16667	7.65472	5.38972	1.66528	7.2428	6.18374	2.54386
516	15.5227	23.4655	4.97513	4.82839	21.6148	2.48184	2.65151	3.90879	2.23881	8.15987	0.658436	0.530035	0.0877188
517	20.5044	26.4066	11.4428	6.45724	23.0133	3.20823	3.78788	29.4788	3.39967	0.832639	27.9835	3.00353	0.614036
518	15.9105	20.3964	4.22886	5.06108	26.3191	-0.544795	5.42929	-0.162867	-0.580431	2.16486	0.987653	0.530035	0.789474
519	16.8188	17.4552	13.4328	4.82839	19.0718	13.7409	5.42929	7.98046	2.73632	0.666111	7.57202	0.530035	1.14035
520	21.2516	23.977	5.0995	2.50145	24.412	1.75545	2.90404	-2.28013	-0.248755	0.499583	-3.29218	-1.76679	1.14035
521	19.9126	-0.703325	11.0696	10.064	1.14431	-0.060532	1.26263	4.56026	-3.23383	-0.666112	0.493827	-0.530036	0.263158
522	18.1648	5.43478	0.995025	1.80337	11.0617	0.544794	2.77778	5.04886	1.40962	0.166528	3.95062	1.06007	-0.0877188
523	17.6687	21.5473	4.10448	4.13031	21.3605	4.17676	3.15657	-2.60586	-0.0829179	0.499583	-2.46914	-3.35689	1.49123
524	16.4417	11.3171	7.21393	4.13031	14.1132	6.35593	4.16667	0.325732	-0.746267	1.99833	0.329218	0	-0.0877188
525	17.7168	13.1074	6.34328	4.13031	13.4774	6.1138	6.18687	-1.14007	2.07297	1.33222	-1.48148	-0.530036	0.789474
526	103.38	65.0256	18.2836	6.22455	82.0089	14.7094	6.94444	47.7199	0.912107	0.666111	36.0494	2.82685	-0.0877188
527	17.3781	20.2685	2.8607	3.78127	21.1062	4.05569	4.0404	74.7557	0.912107	0.666111	88.2305	0.706712	0.964913
528	19.1566	60.2941	9.45274	3.54858	68.7858	9.50363	5.55556	3.09446	-0.912105	0.333057	0.823045	0.176677	1.84211
529	15.4071	7.22506	7.9602	3.66492	12.5874	5.62954	4.29293	7.32899	1.40962	0.499583	7.07819	2.12014	0.438598
530	21.5836	32.4169	4.22886	4.24666	34.4564	0.66586	2.39899	12.8665	0.580433	1.66528	15.6379	-0.883392	0.0877188
531	17.4398	18.9898	2.48756	2.26876	20.2161	2.72397	2.27273	2.28013	-0.746267	0.166528	1.97531	-0.883392	1.14035
532	15.2085	18.6061	2.36319	0.756254	21.4876	-2.9661	0.378789	2.76873	-0.0829179	2.33139	5.26749	-0.530036	1.49123
533	16.5003	19.6291	3.23383	3.43223	22.1233	4.05569	3.15657	-2.443	0.0829191	0.999168	-1.8107	-0.353357	1.31579
534	17.6747	18.2225	9.45274	3.66492	19.7076	7.08232	1.51515	20.5212	-2.40464	0.333057	24.3621	-4.0636	0.263158
535	18.54	13.8747	9.57712	5.99186	18.0547	8.41404	5.05051	5.04886	1.40962	2.33139	5.59671	0.883391	0.438598
536	16.2486	17.8389	6.71642	3.08319	17.1647	4.90315	1.89394	40.5537	-1.74129	0.333057	46.0905	0.706712	-0.0877188
537	31.0515	21.6752	20.2736	6.92263	37.8894	29.8426	6.43939	-1.4658	-0.912105	-0.499584	0.823045	-2.12014	0.614036
538	51.5581	57.8644	58.5821	29.6102	69.2943	49.3341	36.995	130.619	5.05804	0.999168	144.362	5.83039	3.24561
539	16.385	13.8747	4.85075	3.19954	14.3674	4.41889	4.41919	9.12052	-0.248755	0.832639	11.1934	0.883391	0.263158
540	16.8759	12.8517	6.34328	5.17743	12.7146	4.90315	5.05051	4.56026	0.248757	1.66528	2.46914	-0.353357	1.84211
541	16.1053	19.5013	6.59204	3.66492	23.2676	5.14528	5.93435	6.35179	0.912107	1.16569	6.41975	1.41343	1.84211
542	26.6026	28.3248	7.33831	5.64282	30.2606	6.35593	6.94444	0.977198	0.0829191	0	0.493827	3.18021	0.964913
543	24.3473	20.5243	13.1841	7.27167	22.3776	13.3777	7.82828	18.4039	4.89221	1.16569	19.4239	3.00353	2.19298
544	21.3447	21.6752	10.5721	5.41012	24.412	9.2615	7.70202	22.1498	4.22886	2.33139	19.9177	3.88693	0.789474
545	24.0051	27.6854	3.35821	3.78127	28.4806	1.63438	1.51515	2.11726	-0.414593	-0.499584	2.13992	-0.883392	-0.263158
546	51.8398	64.3862	44.7761	15.2996	72.6001	45.339	23.9899	59.9348	4.56053	0.333057	46.749	2.12014	0.0877188
547	82.263	3.90026	4.22886	1.91972	1.78004	1.15012	2.14647	-0.162867	0.248757	-0.333056	-0.987654	-1.06007	1.31579
548	24.159	32.6726	10.9453	3.66492	39.0337	6.71913	2.52525	6.18893	1.07794	4.99584	6.25514	-0.706714	0.0877188
549	15.7284	19.6291	7.71144	4.13031	19.3261	6.23487	5.68182	14.0065	1.74129	-0.333056	16.2963	1.06007	0.789474
550	20.9146	19.3734	4.97513	2.26876	22.2505	3.20823	4.54545	4.07166	0.248757	0	3.78601	-0.883392	1.31579
551	17.4306	18.6061	3.9801	5.64282	20.4704	5.26635	4.41919	19.0554	1.40962	0.832639	20.7407	1.41343	-0.0877188
552	15.5006	18.6061	6.96518	4.71204	22.8862	3.81356	2.65151	-0.162867	0.414594	-0.166528	1.31687	-0.883392	0.964913
553	31.2352	31.266	8.33333	2.26876	35.6008	9.50363	3.40909	6.18893	2.07297	-0.832639	3.78601	0.176677	1.14035
554	19.1211	22.8261	0.746268	6.80628	23.7762	0.423729	3.40909	0.325732	-0.912105	0.832639	0.164608	0.530035	0.964913
555	18.6544	14.8977	5.22388	3.08319	20.7247	6.35593	3.0303	5.04886	0.0829191	0.499583	2.46914	-0.706714	-0.0877188
556	16.208	25.7673	8.08458	3.19954	29.7521	5.87167	5.30303	2.11726	0.912107	0.999168	2.13992	0.706712	0.614036
557	21.4242	19.6291	4.22886	4.363	21.2333	4.17676	4.79798	1.4658	1.24378	0.166528	1.31687	0.353356	1.14035
558	17.9856	23.7212	10.199	4.5957	24.412	6.59806	4.54545	2.60586	1.07794	2.33139	3.45679	0.176677	-0.0877188
