# Supplementary material for: A Novel Class of HIV-1 Inhibitors Targeting the Vpr-Induced G2-Arrest in Macrophages by New Yeast- and Cell-Based High-Throughput Screening
Source: Viruses. 2022 Jun 16;14(6):1321. doi: 10.3390/v14061321 (PMC9227106; doi:10.3390/v14061321)
Supplement: Supplementary file 1 [file viruses-14-01321-s001.zip › Table S2 Result of 2nd screening.xlsx]

## Sheet: 2nd screening
	HeLa viability (%)			G2 arrest recover (CELAVIEW)		G2 arrest recover (Flow cytometry)
ID	viability n=1	viability n=2	AVERAGE	recover rate vs DMSO(%)	cell count vs DMSO	ZsG G1%	ZsG G2%	ZsG G2/G1	Vpr G1%	Vpr G2%	Vpr G2/G1
DMSO	100	100	100	0	100	36.68	17.9	0.488004	19.82	44.1	2.22503
VTD001	107.233	98.3092	102.771	1.151	99.448
VTD002	93.6255	93.5822	93.6038	-0.562792	133.26
VTD003	79.5442	87.9405	83.7423	1.47402	110.709
VTD004	94.848	94.2491	94.5486	-6.33957	117.189
VTD005	68.0264	74.7059	71.3662	-5.60025	118.571
VTD006	102.542	91.7952	97.1687	-2.69161	109.154
VTD007	99.0069	91.6441	95.3255	4.62421	122.258
VTD008	104.537	94.9698	99.7533	65.2212	11.261
VTD009	99.9925	95.9587	97.9756	7.99864	96.2511
VTD010	90.3251	101.655	95.9901	-10.547	104.459
VTD011	67.6685	80.6856	74.177	-6.78886	127.701
VTD012	96.3129	98.0426	97.1778	-8.48932	89.051
VTD013	39.5154	74.5292	57.0223
VTD014	80.3354	80.0809	80.2082	0.559097	118.773
VTD015	97.5885	99.2622	98.4253	-12.3834	109.845
VTD016	13.3499	32.0093	22.6796
VTD017	47.7429	64.8827	56.3128
VTD018	30.2399	55.4817	42.8608
VTD019	74.4774	94.4098	84.4436	6.18288	117.88
VTD020	88.1173	99.6572	93.8872	2.85411	103.883
VTD021	87.9921	99.2876	93.6399	-4.12644	123.151
VTD022	74.7888	92.0055	83.3971	1.44846	118.571
VTD023	82.7148	95.9506	89.3327	-9.23302	118.226
VTD024	8.60608	15.5934	12.0998
VTD025	104.674	94.248	99.4611	7.09688	100.917
VTD026	80.4867	91.9682	86.2275	-6.61354	104.315
VTD027	91.3495	100.166	95.7575	-9.14798	91.7583
VTD028	80.7689	97.9734	89.3711	-2.95825	115.375
VTD029	93.1087	93.7246	93.4167	-4.17712	113.474
VTD030	83.5184	86.8839	85.2011	-6.03492	107.426
VTD031	96.0146	95.5822	95.7984	-0.553177	95.9055
VTD032	87.4979	90.8653	89.1816	26.4404	106.706
VTD033	89.3439	88.1195	88.7317	-9.4307	115.144
VTD034	84.8513	93.9883	89.4198	-9.61567	113.272
VTD035	79.9984	87.6123	83.8053	-3.07811	106.158
VTD036	91.0452	76.4267	83.7359	-3.37912	101.234
VTD037	94.7516	98.6345	96.693	29.8262	53.7993
VTD038	73.3487	84.3992	78.8739	-13.9917	98.4112
VTD039	46.1742	64.9763	55.5752
VTD040	81.1539	91.2414	86.1977	38.5264	74.0748	39.89	16.81	0.421409	35.1	15.69	0.447009
VTD041	59.9963	74.104	67.0502
VTD042	83.8823	90.9975	87.4399	-11.1354	111.631
VTD043	89.7823	93.986	91.8841	4.58998	72.1164
VTD044	101.548	99.1064	100.327	24.641	61.0282
VTD045	49.261	69.8463	59.5537
VTD046	3.01796	8.71824	5.8681
VTD047	102.088	97.0759	99.5821	-13.4788	98.9872
VTD048	99.844	95.338	97.591	-5.90065	79.9789
VTD049	96.785	88.2225	92.5037	43.6461	120.933	36.28	19.12	0.527012	21.31	42.83	2.00985
VTD050	95.2004	82.3494	88.7749	39.9027	81.3269	46.69	14.91	0.31934	37.75	25.19	0.667285
VTD051	95.2363	82.3486	88.7924	-7.60786	118.315
VTD052	96.2657	85.7331	90.9994	-8.0548	100.694
VTD053	97.1004	88.676	92.8882	-7.78444	130.667
VTD054	99.1672	80.5257	89.8465	-2.53194	99.8881
VTD055	99.8821	86.6292	93.2557	9.5311	137.346
VTD056	91.9977	91.0128	91.5053	-3.00172	106.836
VTD057	98.8571	92.3009	95.579	-4.0752	96.1289
VTD058	85.8361	88.1891	87.0126	-8.27324	74.614
VTD059	89.1823	91.7783	90.4803	0.740228	107.507
VTD060	99.3864	97.5595	98.4729	-3.50568	103.446
VTD061	99.3997	97.0004	98.2001	-0.150229	90.9264
VTD062	91.9351	81.3907	86.6629	-0.609728	114.354
VTD063	78.9951	82.1216	80.5583	2.52092	111.032
VTD064	90.7708	95.699	93.2349	2.78289	79.6151
VTD065	100.203	91.4153	95.8091	-4.46021	143.623
VTD066	57.5445	71.5873	64.5659
VTD067	65.6542	72.2525	68.9534
VTD068	101.445	96.8908	99.1681	-10.8077	102.238
VTD069	72.7501	80.1626	76.4564	-2.52714	96.2296
VTD070	91.7786	83.8608	87.8197	-3.39244	110.058
VTD071	99.7855	94.94	97.3627	0.0213418	106.668
VTD072	15.8232	28.8898	22.3565
VTD073	71.1896	87.4125	79.301	5.70656	74.8825
VTD074	88.0242	93.1489	90.5865	0.939538	103.547
VTD075	93.8453	95.8108	94.828	3.63837	111.669
VTD076	77.0871	93.8755	85.4813	2.46464	89.3488
VTD077	63.5882	82.7143	73.1512	-8.55568	117.61
VTD078	93.3425	94.573	93.9577	0.840709	117.375
VTD079	77.1071	85.9685	81.5378	1.89032	87.7377
VTD080	87.2582	95.7363	91.4972	-3.15104	96.9344
VTD081	67.154	81.9178	74.5359	2.28735	68.4046
VTD082	92.9555	85.7372	89.3464	-6.21524	103.177
VTD083	45.1453	58.4869	51.8161
VTD084	99.7518	94.7769	97.2644	6.42735	86.6972
VTD085	66.8233	77.6345	72.2289	19.9967	66.4914
VTD086	85.1095	95.494	90.3017	-0.552123	113.817
VTD087	99.2814	99.587	99.4342	-1.94496	108.212
VTD088	98.5274	84.6226	91.575	-5.85176	115.798
VTD089	85.2869	90.9804	88.1336	-9.60847	78.239
VTD090	94.8035	68.5675	81.6855	-0.40185	99.4182
VTD091	97.5951	93.9111	95.7531	2.17559	93.2423
VTD092	90.2668	86.4316	88.3492	-12.0044	95.122
VTD093	73.9729	82.4008	78.1869	-6.94993	97.4715
VTD094	84.8572	80.5347	82.6959	-8.68662	109.353
VTD095	1.28796	4.53342	2.91069
VTD096	93.1611	94.1171	93.6391	-13.1763	104.956
VTD097	92.5084	59.0096	75.759	14.7193	101.528
VTD098	64.2669	72.9828	68.6249
VTD099	87.4573	71.1084	79.2828	8.06525	122.656
VTD100	85.9357	76.4951	81.2154	6.81179	101.274
VTD101	86.0284	76.9922	81.5103	-8.37301	125.094
VTD102	35.3261	31.8871	33.6066
VTD103	88.5072	89.03	88.7686	-1.84751	97.3632
VTD104	45.3885	41.8976	43.6431
VTD105	95.0626	88.6056	91.8341	-5.31043	106.632
VTD106	89.7228	79.952	84.8374	-3.11097	113.032
VTD107	90.3395	77.9094	84.1244	-4.11313	110.543
VTD108	80.5884	80.2402	80.4143	2.36919	100.385
VTD109	92.2096	82.3421	87.2759	0.15734	109.045
VTD110	93.3397	79.5619	86.4508	10.4224	101.807
VTD111	76.2438	80.7368	78.4903	69.4133	70.8258	35.65	15.87	0.445161	36.27	15.67	0.432037
VTD112	75.1252	79.878	77.5016	-3.48049	97.9981
VTD113	84.3252	86.2639	85.2945	58.7264	91.3954	35.58	19.95	0.560708	16.17	47.56	2.94125
VTD114	78.1669	66.9036	72.5352	12.4119	86.7228
VTD115	80.1513	69.3665	74.7589	-1.89395	107.14
VTD116	90.1549	69.1345	79.6447	3.23404	109.502
VTD117	84.5686	85.212	84.8903	10.5888	92.3096
VTD118	91.7879	81.6772	86.7325	-0.062972	109.349
VTD119	83.4682	83.9492	83.7087	-3.15769	111.584
VTD120	40.7154	48.7745	44.745
VTD121	48.2272	54.4424	51.3348
VTD122	87.4304	85.8508	86.6406	7.11526	106.734
VTD123	58.6508	70.0719	64.3613
VTD124	1.29046	0.875573	1.08302
VTD125	80.8953	72.4254	76.6603	-7.84678	97.8711
VTD126	86.3169	77.7298	82.0233	2.80071	87.3323
VTD127	90.8228	92.4464	91.6346	-4.52009	120.498
VTD128	88.7897	88.7798	88.7848	30.9738	88.1957	39.5	14.98	0.379241	20.63	43.84	2.12506
VTD129	96.7479	89.8175	93.2827	-1.8371	108.638
VTD130	39.9541	47.5566	43.7554
VTD131	80.6504	72.5043	76.5773	6.21162	75.7777
VTD132	36.3476	48.248	42.2978
VTD133	5.93962	3.36707	4.65335
VTD134	44.4125	48.7269	46.5697
VTD135	88.2188	81.3277	84.7732	5.91678	101.02
VTD136	90.4717	87.7472	89.1094	0.146989	106.277
VTD137	95.3948	84.9908	90.1928	-1.62773	107.216
VTD138	90.1038	84.3584	87.2311	-5.67726	103.077
VTD139	82.9811	72.6286	77.8048	7.92062	97.287
VTD140	60.7242	54.8486	57.7864
VTD141	55.4413	50.6804	53.0608
VTD142	12.9083	17.132	15.0201
VTD143	82.4865	72.7674	77.627	-1.32835	103.864
VTD144	92.3201	87.2133	89.7667	-5.37281	107.343
VTD145	101.307	86.9045	94.1059	27.0577	64.9119
VTD146	85.8657	73.2079	79.5368	15.1578	99.4832
VTD147	86.5125	76.3828	81.4476	11.2404	77.5175
VTD148	100.535	84.0932	92.314	22.2977	80.0966
VTD149	94.1439	79.8619	87.0029	73.3732	63.347
VTD150	96.8424	82.7036	89.773	41.736	21.56
VTD151	94.1596	80.8823	87.521	13.809	90.6448
VTD152	97.6804	95.4359	96.5582	-0.0297914	93.2239
VTD153	11.9318	36.5032	24.2175
VTD154	71.0744	62.4843	66.7794
VTD155	89.673	84.3725	87.0227	25.8696	101.251
VTD156	90.2946	78.8359	84.5653	12.5449	90.8766
VTD157	86.4117	77.1013	81.7565	27.3941	98.2371
VTD158	90.8534	76.0953	83.4744	11.719	95.1654
VTD159	98.1008	86.3703	92.2355	7.76687	106.061
VTD160	81.6256	83.3969	82.5112	41.4756	101.164	39.95	15.24	0.381477	21.68	42.46	1.95849
VTD161	96.3149	98.0745	97.1947	4.94757	120.811
VTD162	82.8937	86.579	84.7364	-0.188295	107.597
VTD163	80.148	87.3678	83.7579	18.0397	118.928
VTD164	63.3608	77.5557	70.4583	9.74076	92.7602
VTD165	96.2155	93.6654	94.9405	12.0906	113.248
VTD166	95.7954	96.4925	96.144	20.6894	106.322
VTD167	99.8389	99.7263	99.7826	16.0026	119.305
VTD168	100.541	99.0052	99.7729	18.8498	110.814
VTD169	96.8651	96.6209	96.743	28.4557	98.2082
VTD170	87.9872	83.7943	85.8907	17.213	110.756
VTD171	76.1651	87.4153	81.7902	19.8577	104.236
VTD172	83.0854	90.7035	86.8945	24.6908	108.351
VTD173	44.1431	65.0745	54.6088
VTD174	82.9547	87.5787	85.2667	13.6452	97.5996
VTD175	91.1969	96.809	94.0029	8.94229	114.059
VTD176	74.4302	92.3633	83.3967	151.581	83.0234
VTD177	60.1599	76.8833	68.5216
VTD178	90.9652	93.1993	92.0822	67.4175	122.55	53.52	17.88	0.334081	21.37	54.97	2.5723
VTD179	61.9958	86.9728	74.4843	89.3145	97.1939	47.69	41.24	0.864752	20.38	55.12	2.70461
VTD180	86.3305	86.8802	86.6053	53.4571	122.231	46.85	15.21	0.324653	23.79	49.32	2.07314
VTD181	85.6263	90.1574	87.8919	1.75437	111.509
VTD182	92.6267	90.3463	91.4865	57.0405	94.0932	40.26	30.07	0.746895	8.03	44.29	5.51557
VTD183	90.7645	88.0239	89.3942	67.7755	113.943	55.74	43.69	0.783818	14.91	46.3	3.1053
VTD184	72.2929	73.9758	73.1344	23.7448	104.641
VTD185	75.8237	94.3633	85.0935	63.4071	102.7	41.29	23.54	0.570114	15.73	48.23	3.06612
VTD186	91.9097	93.5486	92.7292	5.93338	111.77
VTD187	86.9345	89.3538	88.1441	18.7453	82.6467
VTD188	86.7037	81.1198	83.9118	14.0461	91.5721
VTD189	92.6595	91.4488	92.0541	10.7485	135.909
VTD190	94.3424	91.3879	92.8651	19.5126	117.392
VTD191	85.817	86.1935	86.0053	7.21165	125.419
VTD192	97.3362	96.5114	96.9238	13.3213	119.073
VTD193	84.6362	87.7225	86.1793	31.4766	53.8427
VTD194	94.72	76.1737	85.4469	121.134	37.9943
VTD195	87.626	90.2074	88.9167	-11.2537	45.1276
VTD196	90.3169	82.7639	86.5404	-16.1972	43.2174
VTD197	89.0009	84.2188	86.6098	-6.85122	49.9627
VTD198	78.7656	89.3514	84.0585	57.0084	48.3808
VTD199	45.2354	67.1075	56.1715
VTD200	95.7031	94.6204	95.1618	-19.0152	69.1539
VTD201	83.2829	91.0178	87.1504	60.9822	58.3197
VTD202	89.9022	93.8983	91.9002	2.43538	48.8285
VTD203	91.4506	91.9391	91.6949	-13.1622	93.1204
VTD204	49.1924	78.3542	63.7733
VTD205	98.4748	94.7099	96.5923	3.2868	68.4375
VTD206	17.1019	29.9387	23.5203
VTD207	87.9451	91.9099	89.9275	10.2415	108.133
VTD208	60.7291	74.5779	67.6535
VTD209	88.0792	88.8184	88.4488	-2.70117	73.6905
VTD210	85.842	87.7402	86.7911	-17.721	102.731
VTD211	83.5773	94.7411	89.1592	-5.60537	81.3908
VTD212	88.4778	93.3033	90.8905	-6.63041	90.9118
VTD213	85.5038	92.2781	88.8909	-17.3093	109.387
VTD214	90.3284	88.5884	89.4584	-13.1542	62.6175
VTD215	87.1835	90.2374	88.7104	-9.62785	69.1837
VTD216	94.3375	91.7448	93.0412	4.46641	83.8681
VTD217	92.9748	83.1978	88.0863	-8.49159	96.8214
VTD218	98.7265	90.928	94.8273	23.8748	65.1246
VTD219	82.5474	84.5277	83.5376	-0.773791	76.5259
VTD220	62.6841	89.2548	75.9694	17.3377	66.9452
VTD221	93.7564	84.9211	89.3388	-13.5108	101.836
VTD222	64.4489	84.1173	74.2831	42.0389	54.947
VTD223	95.1656	92.3859	93.7757	-16.2413	90.5536
VTD224	95.3361	95.5576	95.4469	10.0641	116.789
VTD225	31.7274	64.2658	47.9966
VTD226	88.068	92.5748	90.3214	-21.6698	67.0049
VTD227	84.201	94.1657	89.1834	60.0068	72.7653	44.2	25.62	0.579638	41.76	22.13	0.529933
VTD228	86.3348	88.5544	87.4446	7.9121	65.1843
VTD229	88.3446	91.1305	89.7375	8.19538	81.7788
VTD230	74.5185	79.7883	77.1534	-5.11604	78.8539
VTD231	94.1601	92.2152	93.1876	-12.2749	92.4937
VTD232	87.9748	87.0034	87.4891	49.1827	95.0903	49.39	11.48	0.232436	29.06	39.99	1.37612
VTD233	71.1031	89.4571	80.2801	170.948	81.9878
VTD234	65.1185	77.2997	71.2091	167.528	80.4656
VTD235	86.5688	87.6146	87.0917	-5.46602	97.3884
VTD236	7.37455	17.7582	12.5664
VTD237	13.6539	24.395	19.0244
VTD238	95.0804	89.0875	92.0839	-1.65928	121.862
VTD239	96.4435	93.2311	94.8373	-16.0748	103.089
VTD240	90.8232	95.7135	93.2684	-4.80385	107.029
VTD241	96.1704	91.573	93.8717	8.75563	106.26
VTD242	91.3738	77.8324	84.6031	3.66153	95.2973
VTD243	94.9519	86.7523	90.8521	1.74502	99.6041
VTD244	93.0008	88.196	90.5984	-3.72895	114.143
VTD245	93.2712	89.4085	91.3399	-3.86557	93.6268
VTD246	91.9513	86.9015	89.4264	-10.1944	110.932
VTD247	44.9257	51.3483	48.137
VTD248	99.5642	88.5359	94.05	42.1135	74.4682	48.46	16.15	0.333265	30.68	37.77	1.2311
VTD249	91.709	90.6274	91.1682	11.2412	84.0736
VTD250	76.8907	62.5092	69.6999
VTD251	97.7478	76.2727	87.0102	1.70439	82.7424
VTD252	31.7257	27.8021	29.7639
VTD253	96.5649	79.5496	88.0572	7.8258	86.9448
VTD254	66.3127	64.4993	65.406
VTD255	95.9888	93.2172	94.603	-0.0302492	102.658
VTD256	86.4705	82.5237	84.4971	0.36085	80.1061
VTD257	89.4475	87.3178	88.3827	3.22794	100.544
VTD258	100.778	87.0006	93.8894	33.1902	60.5038
VTD259	88.4359	79.7703	84.1031	5.59617	97.0201
VTD260	95.0576	76.8702	85.9639	14.5577	98.1163
VTD261	44.8546	83.0826	63.9686
VTD262	96.9642	64.1338	80.549	3.58908	120.407
VTD263	65.4635	74.6895	70.0765	95.5364	81.62	43.35	18.73	0.432065	45.86	23.17	0.505233
VTD264	93.7838	77.5017	85.6427	0.378694	130.274
VTD265	101.167	81.4165	91.2917	7.39798	140.923
VTD266	98.0517	78.8726	88.4622	9.5398	120.773
VTD267	95.6882	81.3702	88.5292	19.922	114.978
VTD268	56.7029	86.5729	71.6379	-3.49114	125.445
