# Supplementary material for: A Novel Class of HIV-1 Inhibitors Targeting the Vpr-Induced G2-Arrest in Macrophages by New Yeast- and Cell-Based High-Throughput Screening
Source: Viruses. 2022 Jun 16;14(6):1321. doi: 10.3390/v14061321 (PMC9227106; doi:10.3390/v14061321)
Supplement: Supplementary file 1 [file viruses-14-01321-s001.zip › Table S3 Result of 3rd screening.xlsx]

## Sheet: 3rd screening
	hMDM viability (%)	HIV replication inhibition (%)
ID	Donor 1	Donor 1	Donor 2
DMSO	100	0	0
VTD040	6.00492
VTD050	126.623	0.0949403	-2.35556
VTD111	49.8353
VTD227	81.9716	0.994883	1.02963
VTD232	115.525	0.991472	0.822222
VTD248	111.463	-0.0420694	-0.140741
VTD263	130.839	0.911882	0.733333
